# Supplementary material
Source: Royal Society of Chemistry journal article supplement (doi:10.1039/d6qo00026f)
Supplement: d6qo00026f2.xlsx [file d6qo00026f2.xlsx]

## Sheet: model_set (600 reactions)
			hydrazone	dioxazolone	product	yield (%)
A1	B1	W1	C1(/C=N/N2CCOCC2)=CC=CC=C1	O=C(O1)ON=C1C2=CC=C(C)C=C2	O=C(NC1=CC=CC=C1/C=N/N2CCOCC2)C3=CC=C(C)C=C3	27
A2	B1	W2	CC1=CC=C(/C=N/N2CCOCC2)C=C1	O=C(O1)ON=C1C2=CC=C(C)C=C2	CC1=CC=C(/C=N/N2CCOCC2)C(NC(C3=CC=C(C)C=C3)=O)=C1	36
A3	B1	W3	CC1=CC=CC(/C=N/N2CCOCC2)=C1	O=C(O1)ON=C1C2=CC=C(C)C=C2	CC1=CC=C(NC(C2=CC=C(C)C=C2)=O)C(/C=N/N3CCOCC3)=C1	30
A4	B1	W4	CC1=C(/C=N/N2CCOCC2)C=CC=C1	O=C(O1)ON=C1C2=CC=C(C)C=C2	CC1=CC=CC(NC(C2=CC=C(C)C=C2)=O)=C1/C=N/N3CCOCC3	28
A5	B1	W5	CCC1=CC=C(/C=N/N2CCOCC2)C=C1	O=C(O1)ON=C1C2=CC=C(C)C=C2	O=C(NC1=CC(CC)=CC=C1/C=N/N2CCOCC2)C3=CC=C(C)C=C3	23
A6	B1	W6	CC(C)C1=CC=C(/C=N/N2CCOCC2)C=C1	O=C(O1)ON=C1C2=CC=C(C)C=C2	CC(C)C1=CC=C(/C=N/N2CCOCC2)C(NC(C3=CC=C(C)C=C3)=O)=C1	28
A8	B1	W7	COC1=CC=C(/C=N/N2CCOCC2)C=C1	O=C(O1)ON=C1C2=CC=C(C)C=C2	O=C(NC1=CC(OC)=CC=C1/C=N/N2CCOCC2)C3=CC=C(C)C=C3	23
A9	B1	W8	COC1=C(/C=N/N2CCOCC2)C=CC=C1	O=C(O1)ON=C1C2=CC=C(C)C=C2	O=C(NC1=C(/C=N/N2CCOCC2)C(OC)=CC=C1)C3=CC=C(C)C=C3	4
A11	B1	W9	FC1=CC=C(/C=N/N2CCOCC2)C=C1	O=C(O1)ON=C1C2=CC=C(C)C=C2	FC1=CC(NC(C2=CC=C(C)C=C2)=O)=C(/C=N/N3CCOCC3)C=C1	20
A12	B1	W10	FC1=CC(/C=N/N2CCOCC2)=CC=C1	O=C(O1)ON=C1C2=CC=C(C)C=C2	FC1=CC(/C=N/N2CCOCC2)=C(NC(C3=CC=C(C)C=C3)=O)C=C1	4
A13	B1	W11	FC1=C(/C=N/N2CCOCC2)C=CC=C1	O=C(O1)ON=C1C2=CC=C(C)C=C2	FC1=C(/C=N/N2CCOCC2)C(NC(C3=CC=C(C)C=C3)=O)=CC=C1	11
A14	B1	W12	ClC1=CC=C(/C=N/N2CCOCC2)C=C1	O=C(O1)ON=C1C2=CC=C(C)C=C2	ClC1=CC=C(/C=N/N2CCOCC2)C(NC(C3=CC=C(C)C=C3)=O)=C1	24
A15	B1	W13	BrC1=CC=C(/C=N/N2CCOCC2)C=C1	O=C(O1)ON=C1C2=CC=C(C)C=C2	BrC1=CC=C(/C=N/N2CCOCC2)C(NC(C3=CC=C(C)C=C3)=O)=C1	23
A16	B1	W14	BrC1=C(/C=N/N2CCOCC2)C=CC=C1	O=C(O1)ON=C1C2=CC=C(C)C=C2	BrC1=C(/C=N/N2CCOCC2)C(NC(C3=CC=C(C)C=C3)=O)=CC=C1	20
A17	B1	W15	FC(C1=CC=CC(/C=N/N2CCOCC2)=C1)(F)F	O=C(O1)ON=C1C2=CC=C(C)C=C2	O=C(NC1=CC=C(C(F)(F)F)C=C1/C=N/N2CCOCC2)C3=CC=C(C)C=C3	19
A19	B1	W16	OC(C=C1)=CC=C1/C=N/N2CCOCC2	O=C(O1)ON=C1C2=CC=C(C)C=C2	OC(C=C1NC(C2=CC=C(C)C=C2)=O)=CC=C1/C=N/N3CCOCC3	6
A20	B1	W17	OC(C=CC=C1)=C1/C=N/N2CCOCC2	O=C(O1)ON=C1C2=CC=C(C)C=C2	OC(C=CC=C1NC(C2=CC=C(C)C=C2)=O)=C1/C=N/N3CCOCC3	2
A21	B1	W18	O=C(C1=CC=C(/C=N/N2CCOCC2)C=C1)OC	O=C(O1)ON=C1C2=CC=C(C)C=C2	O=C(NC1=CC(C(OC)=O)=CC=C1/C=N/N2CCOCC2)C3=CC=C(C)C=C3	18
A22	B1	W19	N#CC1=CC=C(/C=N/N2CCOCC2)C=C1	O=C(O1)ON=C1C2=CC=C(C)C=C2	O=C(NC1=CC(C#N)=CC=C1/C=N/N2CCOCC2)C3=CC=C(C)C=C3	11
A23	B1	W20	O=S(C1=CC=C(/C=N/N2CCOCC2)C=C1)(C)=O	O=C(O1)ON=C1C2=CC=C(C)C=C2	O=S(C1=CC=C(/C=N/N2CCOCC2)C(NC(C3=CC=C(C)C=C3)=O)=C1)(C)=O	19
A24	B1	W21	O=[N+](C1=CC(/C=N/N2CCOCC2)=CC=C1)[O-]	O=C(O1)ON=C1C2=CC=C(C)C=C2	O=C(NC1=C(/C=N/N2CCOCC2)C=C(C=C1)[N+]([O-])=O)C3=CC=C(C)C=C3	2
A25	B1	W22	O=[N+](C1=CC=CC=C1/C=N/N2CCOCC2)[O-]	O=C(O1)ON=C1C2=CC=C(C)C=C2	O=C(NC1=C(/C=N/N2CCOCC2)C([N+]([O-])=O)=CC=C1)C3=CC=C(C)C=C3	3
A26	B1	W23	C=CC1=CC=C(/C=N/N2CCOCC2)C=C1	O=C(O1)ON=C1C2=CC=C(C)C=C2	C=CC1=CC=C(/C=N/N2CCOCC2)C(NC(C3=CC=C(C)C=C3)=O)=C1	1
A27	B1	W24	CC1=C(/C=N/N2CCOCC2)C=CC=C1C	O=C(O1)ON=C1C2=CC=C(C)C=C2	CC1=C(/C=N/N2CCOCC2)C(NC(C3=CC=C(C)C=C3)=O)=CC=C1C	36
A28	B1	W25	CC1=CC(C)=CC(/C=N/N2CCOCC2)=C1	O=C(O1)ON=C1C2=CC=C(C)C=C2	CC1=CC(C)=CC(/C=N/N2CCOCC2)=C1NC(C3=CC=C(C)C=C3)=O	5
A29	B1	W26	C12=CC(/C=N/N3CCOCC3)=CC=C1OCC2	O=C(O1)ON=C1C2=CC=C(C)C=C2	O=C(NC1=C(/C=N/N2CCOCC2)C=C(CCO3)C3=C1)C4=CC=C(C)C=C4	20
A30	B1	W27	C1(C=CC=C2)=C2C=CC=C1/C=N\N3CCOCC3	O=C(O1)ON=C1C2=CC=C(C)C=C2	O=C(NC1=CC2=C(C=CC=C2)C(/C=N\N3CCOCC3)=C1)C4=CC=C(C)C=C4	25
A1	B2	W28	C1(/C=N/N2CCOCC2)=CC=CC=C1	O=C(O1)ON=C1C2=CC(C)=CC=C2	O=C(NC1=CC=CC=C1/C=N/N2CCOCC2)C3=CC=CC(C)=C3	67
A2	B2	W29	CC1=CC=C(/C=N/N2CCOCC2)C=C1	O=C(O1)ON=C1C2=CC(C)=CC=C2	CC1=CC=C(/C=N/N2CCOCC2)C(NC(C3=CC=CC(C)=C3)=O)=C1	59
A3	B2	W30	CC1=CC=CC(/C=N/N2CCOCC2)=C1	O=C(O1)ON=C1C2=CC(C)=CC=C2	CC1=CC=C(NC(C2=CC=CC(C)=C2)=O)C(/C=N/N3CCOCC3)=C1	68
A4	B2	W31	CC1=C(/C=N/N2CCOCC2)C=CC=C1	O=C(O1)ON=C1C2=CC(C)=CC=C2	CC1=CC=CC(NC(C2=CC=CC(C)=C2)=O)=C1/C=N/N3CCOCC3	63
A5	B2	W32	CCC1=CC=C(/C=N/N2CCOCC2)C=C1	O=C(O1)ON=C1C2=CC(C)=CC=C2	O=C(NC1=CC(CC)=CC=C1/C=N/N2CCOCC2)C3=CC=CC(C)=C3	55
A6	B2	W33	CC(C)C1=CC=C(/C=N/N2CCOCC2)C=C1	O=C(O1)ON=C1C2=CC(C)=CC=C2	CC(C)C1=CC=C(/C=N/N2CCOCC2)C(NC(C3=CC=CC(C)=C3)=O)=C1	53
A8	B2	W34	COC1=CC=C(/C=N/N2CCOCC2)C=C1	O=C(O1)ON=C1C2=CC(C)=CC=C2	O=C(NC1=CC(OC)=CC=C1/C=N/N2CCOCC2)C3=CC=CC(C)=C3	80
A9	B2	W35	COC1=C(/C=N/N2CCOCC2)C=CC=C1	O=C(O1)ON=C1C2=CC(C)=CC=C2	O=C(NC1=C(/C=N/N2CCOCC2)C(OC)=CC=C1)C3=CC=CC(C)=C3	16
A11	B2	W36	FC1=CC=C(/C=N/N2CCOCC2)C=C1	O=C(O1)ON=C1C2=CC(C)=CC=C2	FC1=CC(NC(C2=CC=CC(C)=C2)=O)=C(/C=N/N3CCOCC3)C=C1	26
A12	B2	W37	FC1=CC(/C=N/N2CCOCC2)=CC=C1	O=C(O1)ON=C1C2=CC(C)=CC=C2	FC1=CC(/C=N/N2CCOCC2)=C(NC(C3=CC=CC(C)=C3)=O)C=C1	17
A13	B2	W38	FC1=C(/C=N/N2CCOCC2)C=CC=C1	O=C(O1)ON=C1C2=CC(C)=CC=C2	FC1=C(/C=N/N2CCOCC2)C(NC(C3=CC=CC(C)=C3)=O)=CC=C1	51
A14	B2	W39	ClC1=CC=C(/C=N/N2CCOCC2)C=C1	O=C(O1)ON=C1C2=CC(C)=CC=C2	ClC1=CC=C(/C=N/N2CCOCC2)C(NC(C3=CC=CC(C)=C3)=O)=C1	50
A15	B2	W40	BrC1=CC=C(/C=N/N2CCOCC2)C=C1	O=C(O1)ON=C1C2=CC(C)=CC=C2	BrC1=CC=C(/C=N/N2CCOCC2)C(NC(C3=CC=CC(C)=C3)=O)=C1	46
A16	B2	W41	BrC1=C(/C=N/N2CCOCC2)C=CC=C1	O=C(O1)ON=C1C2=CC(C)=CC=C2	BrC1=C(/C=N/N2CCOCC2)C(NC(C3=CC=CC(C)=C3)=O)=CC=C1	49
A17	B2	W42	FC(C1=CC=CC(/C=N/N2CCOCC2)=C1)(F)F	O=C(O1)ON=C1C2=CC(C)=CC=C2	O=C(NC1=CC=C(C(F)(F)F)C=C1/C=N/N2CCOCC2)C3=CC=CC(C)=C3	44
A19	B2	W43	OC(C=C1)=CC=C1/C=N/N2CCOCC2	O=C(O1)ON=C1C2=CC(C)=CC=C2	OC(C=C1NC(C2=CC=CC(C)=C2)=O)=CC=C1/C=N/N3CCOCC3	14
A20	B2	W44	OC(C=CC=C1)=C1/C=N/N2CCOCC2	O=C(O1)ON=C1C2=CC(C)=CC=C2	OC(C=CC=C1NC(C2=CC=CC(C)=C2)=O)=C1/C=N/N3CCOCC3	10
A21	B2	W45	O=C(C1=CC=C(/C=N/N2CCOCC2)C=C1)OC	O=C(O1)ON=C1C2=CC(C)=CC=C2	O=C(NC1=CC(C(OC)=O)=CC=C1/C=N/N2CCOCC2)C3=CC=CC(C)=C3	48
A22	B2	W46	N#CC1=CC=C(/C=N/N2CCOCC2)C=C1	O=C(O1)ON=C1C2=CC(C)=CC=C2	O=C(NC1=CC(C#N)=CC=C1/C=N/N2CCOCC2)C3=CC=CC(C)=C3	19
A23	B2	W47	O=S(C1=CC=C(/C=N/N2CCOCC2)C=C1)(C)=O	O=C(O1)ON=C1C2=CC(C)=CC=C2	O=S(C1=CC=C(/C=N/N2CCOCC2)C(NC(C3=CC=CC(C)=C3)=O)=C1)(C)=O	54
A24	B2	W48	O=[N+](C1=CC(/C=N/N2CCOCC2)=CC=C1)[O-]	O=C(O1)ON=C1C2=CC(C)=CC=C2	O=C(NC1=C(/C=N/N2CCOCC2)C=C(C=C1)[N+]([O-])=O)C3=CC=CC(C)=C3	6
A25	B2	W49	O=[N+](C1=CC=CC=C1/C=N/N2CCOCC2)[O-]	O=C(O1)ON=C1C2=CC(C)=CC=C2	O=C(NC1=C(/C=N/N2CCOCC2)C([N+]([O-])=O)=CC=C1)C3=CC=CC(C)=C3	22
A26	B2	W50	C=CC1=CC=C(/C=N/N2CCOCC2)C=C1	O=C(O1)ON=C1C2=CC(C)=CC=C2	C=CC1=CC=C(/C=N/N2CCOCC2)C(NC(C3=CC=CC(C)=C3)=O)=C1	19
A27	B2	W51	CC1=C(/C=N/N2CCOCC2)C=CC=C1C	O=C(O1)ON=C1C2=CC(C)=CC=C2	CC1=C(/C=N/N2CCOCC2)C(NC(C3=CC=CC(C)=C3)=O)=CC=C1C	39
A28	B2	W52	CC1=CC(C)=CC(/C=N/N2CCOCC2)=C1	O=C(O1)ON=C1C2=CC(C)=CC=C2	CC1=CC(C)=CC(/C=N/N2CCOCC2)=C1NC(C3=CC=CC(C)=C3)=O	20
A29	B2	W53	C12=CC(/C=N/N3CCOCC3)=CC=C1OCC2	O=C(O1)ON=C1C2=CC(C)=CC=C2	O=C(NC1=C(/C=N/N2CCOCC2)C=C(CCO3)C3=C1)C4=CC=CC(C)=C4	43
A30	B2	W54	C1(C=CC=C2)=C2C=CC=C1/C=N\N3CCOCC3	O=C(O1)ON=C1C2=CC(C)=CC=C2	O=C(NC1=C(/C=N\N2CCOCC2)C(C=CC=C3)=C3C=C1)C4=CC=CC(C)=C4	49
A1	B3	W55	C1(/C=N/N2CCOCC2)=CC=CC=C1	O=C(O1)ON=C1C2=C(C)C=CC=C2	O=C(NC1=CC=CC=C1/C=N/N2CCOCC2)C3=CC=CC=C3C	12
A2	B3	W56	CC1=CC=C(/C=N/N2CCOCC2)C=C1	O=C(O1)ON=C1C2=C(C)C=CC=C2	CC1=CC=C(/C=N/N2CCOCC2)C(NC(C3=CC=CC=C3C)=O)=C1	15
A3	B3	W57	CC1=CC=CC(/C=N/N2CCOCC2)=C1	O=C(O1)ON=C1C2=C(C)C=CC=C2	CC1=CC=C(NC(C2=CC=CC=C2C)=O)C(/C=N/N3CCOCC3)=C1	13
A4	B3	W58	CC1=C(/C=N/N2CCOCC2)C=CC=C1	O=C(O1)ON=C1C2=C(C)C=CC=C2	CC1=CC=CC(NC(C2=CC=CC=C2C)=O)=C1/C=N/N3CCOCC3	13
A5	B3	W59	CCC1=CC=C(/C=N/N2CCOCC2)C=C1	O=C(O1)ON=C1C2=C(C)C=CC=C2	O=C(NC1=CC(CC)=CC=C1/C=N/N2CCOCC2)C3=CC=CC=C3C	18
A6	B3	W60	CC(C)C1=CC=C(/C=N/N2CCOCC2)C=C1	O=C(O1)ON=C1C2=C(C)C=CC=C2	CC(C)C1=CC=C(/C=N/N2CCOCC2)C(NC(C3=CC=CC=C3C)=O)=C1	17
A8	B3	W61	COC1=CC=C(/C=N/N2CCOCC2)C=C1	O=C(O1)ON=C1C2=C(C)C=CC=C2	O=C(NC1=CC(OC)=CC=C1/C=N/N2CCOCC2)C3=CC=CC=C3C	7
A9	B3	W62	COC1=C(/C=N/N2CCOCC2)C=CC=C1	O=C(O1)ON=C1C2=C(C)C=CC=C2	O=C(NC1=C(/C=N/N2CCOCC2)C(OC)=CC=C1)C3=CC=CC=C3C	7
A11	B3	W63	FC1=CC=C(/C=N/N2CCOCC2)C=C1	O=C(O1)ON=C1C2=C(C)C=CC=C2	FC1=CC(NC(C2=CC=CC=C2C)=O)=C(/C=N/N3CCOCC3)C=C1	12
A12	B3	W64	FC1=CC(/C=N/N2CCOCC2)=CC=C1	O=C(O1)ON=C1C2=C(C)C=CC=C2	FC1=CC(/C=N/N2CCOCC2)=C(NC(C3=CC=CC=C3C)=O)C=C1	3
A13	B3	W65	FC1=C(/C=N/N2CCOCC2)C=CC=C1	O=C(O1)ON=C1C2=C(C)C=CC=C2	FC1=C(/C=N/N2CCOCC2)C(NC(C3=CC=CC=C3C)=O)=CC=C1	4
A14	B3	W66	ClC1=CC=C(/C=N/N2CCOCC2)C=C1	O=C(O1)ON=C1C2=C(C)C=CC=C2	ClC1=CC=C(/C=N/N2CCOCC2)C(NC(C3=CC=CC=C3C)=O)=C1	4
A15	B3	W67	BrC1=CC=C(/C=N/N2CCOCC2)C=C1	O=C(O1)ON=C1C2=C(C)C=CC=C2	BrC1=CC=C(/C=N/N2CCOCC2)C(NC(C3=CC=CC=C3C)=O)=C1	8
A16	B3	W68	BrC1=C(/C=N/N2CCOCC2)C=CC=C1	O=C(O1)ON=C1C2=C(C)C=CC=C2	BrC1=C(/C=N/N2CCOCC2)C(NC(C3=CC=CC=C3C)=O)=CC=C1	11
A17	B3	W69	FC(C1=CC=CC(/C=N/N2CCOCC2)=C1)(F)F	O=C(O1)ON=C1C2=C(C)C=CC=C2	O=C(NC1=CC=C(C(F)(F)F)C=C1/C=N/N2CCOCC2)C3=CC=CC=C3C	3
A19	B3	W70	OC(C=C1)=CC=C1/C=N/N2CCOCC2	O=C(O1)ON=C1C2=C(C)C=CC=C2	OC(C=C1NC(C2=CC=CC=C2C)=O)=CC=C1/C=N/N3CCOCC3	3
A20	B3	W71	OC(C=CC=C1)=C1/C=N/N2CCOCC2	O=C(O1)ON=C1C2=C(C)C=CC=C2	OC(C=CC=C1NC(C2=CC=CC=C2C)=O)=C1/C=N/N3CCOCC3	5
A21	B3	W72	O=C(C1=CC=C(/C=N/N2CCOCC2)C=C1)OC	O=C(O1)ON=C1C2=C(C)C=CC=C2	O=C(NC1=CC(C(OC)=O)=CC=C1/C=N/N2CCOCC2)C3=CC=CC=C3C	13
A22	B3	W73	N#CC1=CC=C(/C=N/N2CCOCC2)C=C1	O=C(O1)ON=C1C2=C(C)C=CC=C2	O=C(NC1=CC(C#N)=CC=C1/C=N/N2CCOCC2)C3=CC=CC=C3C	7
A23	B3	W74	O=S(C1=CC=C(/C=N/N2CCOCC2)C=C1)(C)=O	O=C(O1)ON=C1C2=C(C)C=CC=C2	O=S(C1=CC=C(/C=N/N2CCOCC2)C(NC(C3=CC=CC=C3C)=O)=C1)(C)=O	3
A24	B3	W75	O=[N+](C1=CC(/C=N/N2CCOCC2)=CC=C1)[O-]	O=C(O1)ON=C1C2=C(C)C=CC=C2	O=C(NC1=C(/C=N/N2CCOCC2)C=C(C=C1)[N+]([O-])=O)C3=CC=CC=C3C	1
A25	B3	W76	O=[N+](C1=CC=CC=C1/C=N/N2CCOCC2)[O-]	O=C(O1)ON=C1C2=C(C)C=CC=C2	O=C(NC1=C(/C=N/N2CCOCC2)C([N+]([O-])=O)=CC=C1)C3=CC=CC=C3C	2
A26	B3	W77	C=CC1=CC=C(/C=N/N2CCOCC2)C=C1	O=C(O1)ON=C1C2=C(C)C=CC=C2	C=CC1=CC=C(/C=N/N2CCOCC2)C(NC(C3=CC=CC=C3C)=O)=C1	1
A27	B3	W78	CC1=C(/C=N/N2CCOCC2)C=CC=C1C	O=C(O1)ON=C1C2=C(C)C=CC=C2	CC1=C(/C=N/N2CCOCC2)C(NC(C3=CC=CC=C3C)=O)=CC=C1C	18
A28	B3	W79	CC1=CC(C)=CC(/C=N/N2CCOCC2)=C1	O=C(O1)ON=C1C2=C(C)C=CC=C2	CC1=CC(C)=CC(/C=N/N2CCOCC2)=C1NC(C3=CC=CC=C3C)=O	0
A29	B3	W80	C12=CC(/C=N/N3CCOCC3)=CC=C1OCC2	O=C(O1)ON=C1C2=C(C)C=CC=C2	O=C(NC1=C(/C=N/N2CCOCC2)C=C(CCO3)C3=C1)C4=CC=CC=C4C	15
A30	B3	W81	C1(C=CC=C2)=C2C=CC=C1/C=N\N3CCOCC3	O=C(O1)ON=C1C2=C(C)C=CC=C2	O=C(NC1=C(/C=N\N2CCOCC2)C(C=CC=C3)=C3C=C1)C4=CC=CC=C4C	9
A1	B4	W82	C1(/C=N/N2CCOCC2)=CC=CC=C1	O=C(O1)ON=C1C2=CC=C(OC)C=C2	O=C(NC1=CC=CC=C1/C=N/N2CCOCC2)C3=CC=C(OC)C=C3	8
A2	B4	W83	CC1=CC=C(/C=N/N2CCOCC2)C=C1	O=C(O1)ON=C1C2=CC=C(OC)C=C2	O=C(NC1=CC(C)=CC=C1/C=N/N2CCOCC2)C3=CC=C(OC)C=C3	19
A3	B4	W84	CC1=CC=CC(/C=N/N2CCOCC2)=C1	O=C(O1)ON=C1C2=CC=C(OC)C=C2	O=C(NC1=CC=C(C)C=C1/C=N/N2CCOCC2)C3=CC=C(OC)C=C3	16
A4	B4	W85	CC1=C(/C=N/N2CCOCC2)C=CC=C1	O=C(O1)ON=C1C2=CC=C(OC)C=C2	O=C(NC1=C(/C=N/N2CCOCC2)C(C)=CC=C1)C3=CC=C(OC)C=C3	19
A5	B4	W86	CCC1=CC=C(/C=N/N2CCOCC2)C=C1	O=C(O1)ON=C1C2=CC=C(OC)C=C2	O=C(NC1=CC(CC)=CC=C1/C=N/N2CCOCC2)C3=CC=C(OC)C=C3	16
A6	B4	W87	CC(C)C1=CC=C(/C=N/N2CCOCC2)C=C1	O=C(O1)ON=C1C2=CC=C(OC)C=C2	O=C(NC1=CC(C(C)C)=CC=C1/C=N/N2CCOCC2)C3=CC=C(OC)C=C3	24
A8	B4	W88	COC1=CC=C(/C=N/N2CCOCC2)C=C1	O=C(O1)ON=C1C2=CC=C(OC)C=C2	O=C(NC1=CC(OC)=CC=C1/C=N/N2CCOCC2)C3=CC=C(OC)C=C3	8
A9	B4	W89	COC1=C(/C=N/N2CCOCC2)C=CC=C1	O=C(O1)ON=C1C2=CC=C(OC)C=C2	O=C(NC1=C(/C=N/N2CCOCC2)C(OC)=CC=C1)C3=CC=C(OC)C=C3	1
A11	B4	W90	FC1=CC=C(/C=N/N2CCOCC2)C=C1	O=C(O1)ON=C1C2=CC=C(OC)C=C2	O=C(NC1=C(/C=N/N2CCOCC2)C=CC(F)=C1)C3=CC=C(OC)C=C3	4
A12	B4	W91	FC1=CC(/C=N/N2CCOCC2)=CC=C1	O=C(O1)ON=C1C2=CC=C(OC)C=C2	O=C(NC1=C(/C=N/N2CCOCC2)C=C(F)C=C1)C3=CC=C(OC)C=C3	3
A13	B4	W92	FC1=C(/C=N/N2CCOCC2)C=CC=C1	O=C(O1)ON=C1C2=CC=C(OC)C=C2	O=C(NC1=CC=CC(F)=C1/C=N/N2CCOCC2)C3=CC=C(OC)C=C3	8
A14	B4	W93	ClC1=CC=C(/C=N/N2CCOCC2)C=C1	O=C(O1)ON=C1C2=CC=C(OC)C=C2	O=C(NC1=CC(Cl)=CC=C1/C=N/N2CCOCC2)C3=CC=C(OC)C=C3	6
A15	B4	W94	BrC1=CC=C(/C=N/N2CCOCC2)C=C1	O=C(O1)ON=C1C2=CC=C(OC)C=C2	O=C(NC1=CC(Br)=CC=C1/C=N/N2CCOCC2)C3=CC=C(OC)C=C3	6
A16	B4	W95	BrC1=C(/C=N/N2CCOCC2)C=CC=C1	O=C(O1)ON=C1C2=CC=C(OC)C=C2	O=C(NC1=CC=CC(Br)=C1/C=N/N2CCOCC2)C3=CC=C(OC)C=C3	7
A17	B4	W96	FC(C1=CC=CC(/C=N/N2CCOCC2)=C1)(F)F	O=C(O1)ON=C1C2=CC=C(OC)C=C2	O=C(NC1=CC=C(C(F)(F)F)C=C1/C=N/N2CCOCC2)C3=CC=C(OC)C=C3	9
A19	B4	W97	OC(C=C1)=CC=C1/C=N/N2CCOCC2	O=C(O1)ON=C1C2=CC=C(OC)C=C2	O=C(NC1=CC(O)=CC=C1/C=N/N2CCOCC2)C3=CC=C(OC)C=C3	9
A20	B4	W98	OC(C=CC=C1)=C1/C=N/N2CCOCC2	O=C(O1)ON=C1C2=CC=C(OC)C=C2	O=C(NC1=CC=CC(O)=C1/C=N/N2CCOCC2)C3=CC=C(OC)C=C3	1
A21	B4	W99	O=C(C1=CC=C(/C=N/N2CCOCC2)C=C1)OC	O=C(O1)ON=C1C2=CC=C(OC)C=C2	O=C(NC1=CC(C(OC)=O)=CC=C1/C=N/N2CCOCC2)C3=CC=C(OC)C=C3	8
A22	B4	W100	N#CC1=CC=C(/C=N/N2CCOCC2)C=C1	O=C(O1)ON=C1C2=CC=C(OC)C=C2	O=C(NC1=CC(C#N)=CC=C1/C=N/N2CCOCC2)C3=CC=C(OC)C=C3	1
A23	B4	W101	O=S(C1=CC=C(/C=N/N2CCOCC2)C=C1)(C)=O	O=C(O1)ON=C1C2=CC=C(OC)C=C2	O=C(NC1=CC(S(=O)(C)=O)=CC=C1/C=N/N2CCOCC2)C3=CC=C(OC)C=C3	3
A24	B4	W102	O=[N+](C1=CC(/C=N/N2CCOCC2)=CC=C1)[O-]	O=C(O1)ON=C1C2=CC=C(OC)C=C2	O=C(NC1=C(/C=N/N2CCOCC2)C=C(C=C1)[N+]([O-])=O)C3=CC=C(OC)C=C3	1
A25	B4	W103	O=[N+](C1=CC=CC=C1/C=N/N2CCOCC2)[O-]	O=C(O1)ON=C1C2=CC=C(OC)C=C2	O=C(NC1=C(/C=N/N2CCOCC2)C([N+]([O-])=O)=CC=C1)C3=CC=C(OC)C=C3	4
A26	B4	W104	C=CC1=CC=C(/C=N/N2CCOCC2)C=C1	O=C(O1)ON=C1C2=CC=C(OC)C=C2	O=C(NC1=CC(C=C)=CC=C1/C=N/N2CCOCC2)C3=CC=C(OC)C=C3	1
A27	B4	W105	CC1=C(/C=N/N2CCOCC2)C=CC=C1C	O=C(O1)ON=C1C2=CC=C(OC)C=C2	O=C(NC1=CC=C(C)C(C)=C1/C=N/N2CCOCC2)C3=CC=C(OC)C=C3	13
A28	B4	W106	CC1=CC(C)=CC(/C=N/N2CCOCC2)=C1	O=C(O1)ON=C1C2=CC=C(OC)C=C2	O=C(NC1=C(/C=N/N2CCOCC2)C=C(C)C=C1C)C3=CC=C(OC)C=C3	5
A29	B4	W107	C12=CC(/C=N/N3CCOCC3)=CC=C1OCC2	O=C(O1)ON=C1C2=CC=C(OC)C=C2	O=C(NC1=C(/C=N/N2CCOCC2)C=C(CCO3)C3=C1)C4=CC=C(OC)C=C4	16
A30	B4	W108	C1(C=CC=C2)=C2C=CC=C1/C=N\N3CCOCC3	O=C(O1)ON=C1C2=CC=C(OC)C=C2	O=C(NC1=C(/C=N\N2CCOCC2)C(C=CC=C3)=C3C=C1)C4=CC=C(OC)C=C4	2
A1	B6	W109	C1(/C=N/N2CCOCC2)=CC=CC=C1	O=C(O1)ON=C1C2=CC=C(F)C=C2	O=C(NC1=CC=CC=C1/C=N/N2CCOCC2)C3=CC=C(F)C=C3	53
A2	B6	W110	CC1=CC=C(/C=N/N2CCOCC2)C=C1	O=C(O1)ON=C1C2=CC=C(F)C=C2	O=C(NC1=CC(C)=CC=C1/C=N/N2CCOCC2)C3=CC=C(F)C=C3	20
A3	B6	W111	CC1=CC=CC(/C=N/N2CCOCC2)=C1	O=C(O1)ON=C1C2=CC=C(F)C=C2	O=C(NC1=CC=C(C)C=C1/C=N/N2CCOCC2)C3=CC=C(F)C=C3	35
A4	B6	W112	CC1=C(/C=N/N2CCOCC2)C=CC=C1	O=C(O1)ON=C1C2=CC=C(F)C=C2	O=C(NC1=C(/C=N/N2CCOCC2)C(C)=CC=C1)C3=CC=C(F)C=C3	66
A5	B6	W113	CCC1=CC=C(/C=N/N2CCOCC2)C=C1	O=C(O1)ON=C1C2=CC=C(F)C=C2	O=C(NC1=CC(CC)=CC=C1/C=N/N2CCOCC2)C3=CC=C(F)C=C3	57
A6	B6	W114	CC(C)C1=CC=C(/C=N/N2CCOCC2)C=C1	O=C(O1)ON=C1C2=CC=C(F)C=C2	O=C(NC1=CC(C(C)C)=CC=C1/C=N/N2CCOCC2)C3=CC=C(F)C=C3	48
A8	B6	W115	COC1=CC=C(/C=N/N2CCOCC2)C=C1	O=C(O1)ON=C1C2=CC=C(F)C=C2	O=C(NC1=CC(OC)=CC=C1/C=N/N2CCOCC2)C3=CC=C(F)C=C3	56
A9	B6	W116	COC1=C(/C=N/N2CCOCC2)C=CC=C1	O=C(O1)ON=C1C2=CC=C(F)C=C2	O=C(NC1=C(/C=N/N2CCOCC2)C(OC)=CC=C1)C3=CC=C(F)C=C3	14
A11	B6	W117	FC1=CC=C(/C=N/N2CCOCC2)C=C1	O=C(O1)ON=C1C2=CC=C(F)C=C2	O=C(NC1=C(/C=N/N2CCOCC2)C=CC(F)=C1)C3=CC=C(F)C=C3	41
A12	B6	W118	FC1=CC(/C=N/N2CCOCC2)=CC=C1	O=C(O1)ON=C1C2=CC=C(F)C=C2	O=C(NC1=C(/C=N/N2CCOCC2)C=C(F)C=C1)C3=CC=C(F)C=C3	33
A13	B6	W119	FC1=C(/C=N/N2CCOCC2)C=CC=C1	O=C(O1)ON=C1C2=CC=C(F)C=C2	O=C(NC1=CC=CC(F)=C1/C=N/N2CCOCC2)C3=CC=C(F)C=C3	72
A14	B6	W120	ClC1=CC=C(/C=N/N2CCOCC2)C=C1	O=C(O1)ON=C1C2=CC=C(F)C=C2	O=C(NC1=CC(Cl)=CC=C1/C=N/N2CCOCC2)C3=CC=C(F)C=C3	60
A15	B6	W121	BrC1=CC=C(/C=N/N2CCOCC2)C=C1	O=C(O1)ON=C1C2=CC=C(F)C=C2	O=C(NC1=CC(Br)=CC=C1/C=N/N2CCOCC2)C3=CC=C(F)C=C3	66
A16	B6	W122	BrC1=C(/C=N/N2CCOCC2)C=CC=C1	O=C(O1)ON=C1C2=CC=C(F)C=C2	O=C(NC1=CC=CC(Br)=C1/C=N/N2CCOCC2)C3=CC=C(F)C=C3	68
A17	B6	W123	FC(C1=CC=CC(/C=N/N2CCOCC2)=C1)(F)F	O=C(O1)ON=C1C2=CC=C(F)C=C2	O=C(NC1=CC=C(C(F)(F)F)C=C1/C=N/N2CCOCC2)C3=CC=C(F)C=C3	40
A19	B6	W124	OC(C=C1)=CC=C1/C=N/N2CCOCC2	O=C(O1)ON=C1C2=CC=C(F)C=C2	O=C(NC1=CC(O)=CC=C1/C=N/N2CCOCC2)C3=CC=C(F)C=C3	7
A20	B6	W125	OC(C=CC=C1)=C1/C=N/N2CCOCC2	O=C(O1)ON=C1C2=CC=C(F)C=C2	O=C(NC1=CC=CC(O)=C1/C=N/N2CCOCC2)C3=CC=C(F)C=C3	9
A21	B6	W126	O=C(C1=CC=C(/C=N/N2CCOCC2)C=C1)OC	O=C(O1)ON=C1C2=CC=C(F)C=C2	O=C(NC1=CC(C(OC)=O)=CC=C1/C=N/N2CCOCC2)C3=CC=C(F)C=C3	54
A22	B6	W127	N#CC1=CC=C(/C=N/N2CCOCC2)C=C1	O=C(O1)ON=C1C2=CC=C(F)C=C2	O=C(NC1=CC(C#N)=CC=C1/C=N/N2CCOCC2)C3=CC=C(F)C=C3	11
A23	B6	W128	O=S(C1=CC=C(/C=N/N2CCOCC2)C=C1)(C)=O	O=C(O1)ON=C1C2=CC=C(F)C=C2	O=C(NC1=CC(S(=O)(C)=O)=CC=C1/C=N/N2CCOCC2)C3=CC=C(F)C=C3	64
A24	B6	W129	O=[N+](C1=CC(/C=N/N2CCOCC2)=CC=C1)[O-]	O=C(O1)ON=C1C2=CC=C(F)C=C2	O=C(NC1=C(/C=N/N2CCOCC2)C=C(C=C1)[N+]([O-])=O)C3=CC=C(F)C=C3	1
A25	B6	W130	O=[N+](C1=CC=CC=C1/C=N/N2CCOCC2)[O-]	O=C(O1)ON=C1C2=CC=C(F)C=C2	O=C(NC1=C(/C=N/N2CCOCC2)C([N+]([O-])=O)=CC=C1)C3=CC=C(F)C=C3	69
A26	B6	W131	C=CC1=CC=C(/C=N/N2CCOCC2)C=C1	O=C(O1)ON=C1C2=CC=C(F)C=C2	O=C(NC1=CC(C=C)=CC=C1/C=N/N2CCOCC2)C3=CC=C(F)C=C3	5
A27	B6	W132	CC1=C(/C=N/N2CCOCC2)C=CC=C1C	O=C(O1)ON=C1C2=CC=C(F)C=C2	O=C(NC1=CC=C(C)C(C)=C1/C=N/N2CCOCC2)C3=CC=C(F)C=C3	65
A28	B6	W133	CC1=CC(C)=CC(/C=N/N2CCOCC2)=C1	O=C(O1)ON=C1C2=CC=C(F)C=C2	O=C(NC1=C(/C=N/N2CCOCC2)C=C(C)C=C1C)C3=CC=C(F)C=C3	26
A29	B6	W134	C12=CC(/C=N/N3CCOCC3)=CC=C1OCC2	O=C(O1)ON=C1C2=CC=C(F)C=C2	O=C(NC1=C(/C=N/N2CCOCC2)C=C(CCO3)C3=C1)C4=CC=C(F)C=C4	47
A30	B6	W135	C1(C=CC=C2)=C2C=CC=C1/C=N\N3CCOCC3	O=C(O1)ON=C1C2=CC=C(F)C=C2	O=C(NC1=C(/C=N\N2CCOCC2)C(C=CC=C3)=C3C=C1)C4=CC=C(F)C=C4	52
A1	B7	W136	C1(/C=N/N2CCOCC2)=CC=CC=C1	O=C(O1)ON=C1C2=CC=C(Cl)C=C2	O=C(NC1=CC=CC=C1/C=N/N2CCOCC2)C3=CC=C(Cl)C=C3	65
A2	B7	W137	CC1=CC=C(/C=N/N2CCOCC2)C=C1	O=C(O1)ON=C1C2=CC=C(Cl)C=C2	O=C(NC1=CC(C)=CC=C1/C=N/N2CCOCC2)C3=CC=C(Cl)C=C3	43
A3	B7	W138	CC1=CC=CC(/C=N/N2CCOCC2)=C1	O=C(O1)ON=C1C2=CC=C(Cl)C=C2	O=C(NC1=CC=C(C)C=C1/C=N/N2CCOCC2)C3=CC=C(Cl)C=C3	47
A4	B7	W139	CC1=C(/C=N/N2CCOCC2)C=CC=C1	O=C(O1)ON=C1C2=CC=C(Cl)C=C2	O=C(NC1=C(/C=N/N2CCOCC2)C(C)=CC=C1)C3=CC=C(Cl)C=C3	58
A5	B7	W140	CCC1=CC=C(/C=N/N2CCOCC2)C=C1	O=C(O1)ON=C1C2=CC=C(Cl)C=C2	O=C(NC1=CC(CC)=CC=C1/C=N/N2CCOCC2)C3=CC=C(Cl)C=C3	49
A6	B7	W141	CC(C)C1=CC=C(/C=N/N2CCOCC2)C=C1	O=C(O1)ON=C1C2=CC=C(Cl)C=C2	O=C(NC1=CC(C(C)C)=CC=C1/C=N/N2CCOCC2)C3=CC=C(Cl)C=C3	45
A8	B7	W142	COC1=CC=C(/C=N/N2CCOCC2)C=C1	O=C(O1)ON=C1C2=CC=C(Cl)C=C2	O=C(NC1=CC(OC)=CC=C1/C=N/N2CCOCC2)C3=CC=C(Cl)C=C3	58
A9	B7	W143	COC1=C(/C=N/N2CCOCC2)C=CC=C1	O=C(O1)ON=C1C2=CC=C(Cl)C=C2	O=C(NC1=C(/C=N/N2CCOCC2)C(OC)=CC=C1)C3=CC=C(Cl)C=C3	4
A11	B7	W144	FC1=CC=C(/C=N/N2CCOCC2)C=C1	O=C(O1)ON=C1C2=CC=C(Cl)C=C2	O=C(NC1=C(/C=N/N2CCOCC2)C=CC(F)=C1)C3=CC=C(Cl)C=C3	68
A12	B7	W145	FC1=CC(/C=N/N2CCOCC2)=CC=C1	O=C(O1)ON=C1C2=CC=C(Cl)C=C2	O=C(NC1=C(/C=N/N2CCOCC2)C=C(F)C=C1)C3=CC=C(Cl)C=C3	38
A13	B7	W146	FC1=C(/C=N/N2CCOCC2)C=CC=C1	O=C(O1)ON=C1C2=CC=C(Cl)C=C2	O=C(NC1=CC=CC(F)=C1/C=N/N2CCOCC2)C3=CC=C(Cl)C=C3	76
A14	B7	W147	ClC1=CC=C(/C=N/N2CCOCC2)C=C1	O=C(O1)ON=C1C2=CC=C(Cl)C=C2	O=C(NC1=CC(Cl)=CC=C1/C=N/N2CCOCC2)C3=CC=C(Cl)C=C3	63
A15	B7	W148	BrC1=CC=C(/C=N/N2CCOCC2)C=C1	O=C(O1)ON=C1C2=CC=C(Cl)C=C2	O=C(NC1=CC(Br)=CC=C1/C=N/N2CCOCC2)C3=CC=C(Cl)C=C3	51
A16	B7	W149	BrC1=C(/C=N/N2CCOCC2)C=CC=C1	O=C(O1)ON=C1C2=CC=C(Cl)C=C2	O=C(NC1=CC=CC(Br)=C1/C=N/N2CCOCC2)C3=CC=C(Cl)C=C3	55
A17	B7	W150	FC(C1=CC=CC(/C=N/N2CCOCC2)=C1)(F)F	O=C(O1)ON=C1C2=CC=C(Cl)C=C2	O=C(NC1=CC=C(C(F)(F)F)C=C1/C=N/N2CCOCC2)C3=CC=C(Cl)C=C3	46
A19	B7	W151	OC(C=C1)=CC=C1/C=N/N2CCOCC2	O=C(O1)ON=C1C2=CC=C(Cl)C=C2	O=C(NC1=CC(O)=CC=C1/C=N/N2CCOCC2)C3=CC=C(Cl)C=C3	3
A20	B7	W152	OC(C=CC=C1)=C1/C=N/N2CCOCC2	O=C(O1)ON=C1C2=CC=C(Cl)C=C2	O=C(NC1=CC=CC(O)=C1/C=N/N2CCOCC2)C3=CC=C(Cl)C=C3	11
A21	B7	W153	O=C(C1=CC=C(/C=N/N2CCOCC2)C=C1)OC	O=C(O1)ON=C1C2=CC=C(Cl)C=C2	O=C(NC1=CC(C(OC)=O)=CC=C1/C=N/N2CCOCC2)C3=CC=C(Cl)C=C3	58
A22	B7	W154	N#CC1=CC=C(/C=N/N2CCOCC2)C=C1	O=C(O1)ON=C1C2=CC=C(Cl)C=C2	O=C(NC1=CC(C#N)=CC=C1/C=N/N2CCOCC2)C3=CC=C(Cl)C=C3	15
A23	B7	W155	O=S(C1=CC=C(/C=N/N2CCOCC2)C=C1)(C)=O	O=C(O1)ON=C1C2=CC=C(Cl)C=C2	O=C(NC1=CC(S(=O)(C)=O)=CC=C1/C=N/N2CCOCC2)C3=CC=C(Cl)C=C3	46
A24	B7	W156	O=[N+](C1=CC(/C=N/N2CCOCC2)=CC=C1)[O-]	O=C(O1)ON=C1C2=CC=C(Cl)C=C2	O=C(NC1=C(/C=N/N2CCOCC2)C=C(C=C1)[N+]([O-])=O)C3=CC=C(Cl)C=C3	4
A25	B7	W157	O=[N+](C1=CC=CC=C1/C=N/N2CCOCC2)[O-]	O=C(O1)ON=C1C2=CC=C(Cl)C=C2	O=C(NC1=C(/C=N/N2CCOCC2)C([N+]([O-])=O)=CC=C1)C3=CC=C(Cl)C=C3	77
A26	B7	W158	C=CC1=CC=C(/C=N/N2CCOCC2)C=C1	O=C(O1)ON=C1C2=CC=C(Cl)C=C2	O=C(NC1=CC(C=C)=CC=C1/C=N/N2CCOCC2)C3=CC=C(Cl)C=C3	7
A27	B7	W159	CC1=C(/C=N/N2CCOCC2)C=CC=C1C	O=C(O1)ON=C1C2=CC=C(Cl)C=C2	O=C(NC1=CC=C(C)C(C)=C1/C=N/N2CCOCC2)C3=CC=C(Cl)C=C3	40
A28	B7	W160	CC1=CC(C)=CC(/C=N/N2CCOCC2)=C1	O=C(O1)ON=C1C2=CC=C(Cl)C=C2	O=C(NC1=C(/C=N/N2CCOCC2)C=C(C)C=C1C)C3=CC=C(Cl)C=C3	5
A29	B7	W161	C12=CC(/C=N/N3CCOCC3)=CC=C1OCC2	O=C(O1)ON=C1C2=CC=C(Cl)C=C2	O=C(NC1=C(/C=N/N2CCOCC2)C=C(CCO3)C3=C1)C4=CC=C(Cl)C=C4	13
A30	B7	W162	C1(C=CC=C2)=C2C=CC=C1/C=N\N3CCOCC3	O=C(O1)ON=C1C2=CC=C(Cl)C=C2	O=C(NC1=C(/C=N\N2CCOCC2)C(C=CC=C3)=C3C=C1)C4=CC=C(Cl)C=C4	50
A1	B9	W163	C1(/C=N/N2CCOCC2)=CC=CC=C1	O=C(O1)ON=C1C2=CC=C(I)C=C2	O=C(NC1=CC=CC=C1/C=N/N2CCOCC2)C3=CC=C(I)C=C3	62
A2	B9	W164	CC1=CC=C(/C=N/N2CCOCC2)C=C1	O=C(O1)ON=C1C2=CC=C(I)C=C2	O=C(NC1=CC(C)=CC=C1/C=N/N2CCOCC2)C3=CC=C(I)C=C3	54
A3	B9	W165	CC1=CC=CC(/C=N/N2CCOCC2)=C1	O=C(O1)ON=C1C2=CC=C(I)C=C2	O=C(NC1=CC=C(C)C=C1/C=N/N2CCOCC2)C3=CC=C(I)C=C3	67
A4	B9	W166	CC1=C(/C=N/N2CCOCC2)C=CC=C1	O=C(O1)ON=C1C2=CC=C(I)C=C2	O=C(NC1=C(/C=N/N2CCOCC2)C(C)=CC=C1)C3=CC=C(I)C=C3	73
A5	B9	W167	CCC1=CC=C(/C=N/N2CCOCC2)C=C1	O=C(O1)ON=C1C2=CC=C(I)C=C2	O=C(NC1=CC(CC)=CC=C1/C=N/N2CCOCC2)C3=CC=C(I)C=C3	52
A6	B9	W168	CC(C)C1=CC=C(/C=N/N2CCOCC2)C=C1	O=C(O1)ON=C1C2=CC=C(I)C=C2	O=C(NC1=CC(C(C)C)=CC=C1/C=N/N2CCOCC2)C3=CC=C(I)C=C3	42
A8	B9	W169	COC1=CC=C(/C=N/N2CCOCC2)C=C1	O=C(O1)ON=C1C2=CC=C(I)C=C2	O=C(NC1=CC(OC)=CC=C1/C=N/N2CCOCC2)C3=CC=C(I)C=C3	57
A9	B9	W170	COC1=C(/C=N/N2CCOCC2)C=CC=C1	O=C(O1)ON=C1C2=CC=C(I)C=C2	O=C(NC1=C(/C=N/N2CCOCC2)C(OC)=CC=C1)C3=CC=C(I)C=C3	3
A11	B9	W171	FC1=CC=C(/C=N/N2CCOCC2)C=C1	O=C(O1)ON=C1C2=CC=C(I)C=C2	O=C(NC1=C(/C=N/N2CCOCC2)C=CC(F)=C1)C3=CC=C(I)C=C3	46
A12	B9	W172	FC1=CC(/C=N/N2CCOCC2)=CC=C1	O=C(O1)ON=C1C2=CC=C(I)C=C2	O=C(NC1=C(/C=N/N2CCOCC2)C=C(F)C=C1)C3=CC=C(I)C=C3	34
A13	B9	W173	FC1=C(/C=N/N2CCOCC2)C=CC=C1	O=C(O1)ON=C1C2=CC=C(I)C=C2	O=C(NC1=CC=CC(F)=C1/C=N/N2CCOCC2)C3=CC=C(I)C=C3	63
A14	B9	W174	ClC1=CC=C(/C=N/N2CCOCC2)C=C1	O=C(O1)ON=C1C2=CC=C(I)C=C2	O=C(NC1=CC(Cl)=CC=C1/C=N/N2CCOCC2)C3=CC=C(I)C=C3	51
A15	B9	W175	BrC1=CC=C(/C=N/N2CCOCC2)C=C1	O=C(O1)ON=C1C2=CC=C(I)C=C2	O=C(NC1=CC(Br)=CC=C1/C=N/N2CCOCC2)C3=CC=C(I)C=C3	47
A16	B9	W176	BrC1=C(/C=N/N2CCOCC2)C=CC=C1	O=C(O1)ON=C1C2=CC=C(I)C=C2	O=C(NC1=CC=CC(Br)=C1/C=N/N2CCOCC2)C3=CC=C(I)C=C3	51
A17	B9	W177	FC(C1=CC=CC(/C=N/N2CCOCC2)=C1)(F)F	O=C(O1)ON=C1C2=CC=C(I)C=C2	O=C(NC1=CC=C(C(F)(F)F)C=C1/C=N/N2CCOCC2)C3=CC=C(I)C=C3	55
A19	B9	W178	OC(C=C1)=CC=C1/C=N/N2CCOCC2	O=C(O1)ON=C1C2=CC=C(I)C=C2	O=C(NC1=CC(O)=CC=C1/C=N/N2CCOCC2)C3=CC=C(I)C=C3	4
A20	B9	W179	OC(C=CC=C1)=C1/C=N/N2CCOCC2	O=C(O1)ON=C1C2=CC=C(I)C=C2	O=C(NC1=CC=CC(O)=C1/C=N/N2CCOCC2)C3=CC=C(I)C=C3	8
A21	B9	W180	O=C(C1=CC=C(/C=N/N2CCOCC2)C=C1)OC	O=C(O1)ON=C1C2=CC=C(I)C=C2	O=C(NC1=CC(C(OC)=O)=CC=C1/C=N/N2CCOCC2)C3=CC=C(I)C=C3	41
A22	B9	W181	N#CC1=CC=C(/C=N/N2CCOCC2)C=C1	O=C(O1)ON=C1C2=CC=C(I)C=C2	O=C(NC1=CC(C#N)=CC=C1/C=N/N2CCOCC2)C3=CC=C(I)C=C3	10
A23	B9	W182	O=S(C1=CC=C(/C=N/N2CCOCC2)C=C1)(C)=O	O=C(O1)ON=C1C2=CC=C(I)C=C2	O=C(NC1=CC(S(=O)(C)=O)=CC=C1/C=N/N2CCOCC2)C3=CC=C(I)C=C3	55
A24	B9	W183	O=[N+](C1=CC(/C=N/N2CCOCC2)=CC=C1)[O-]	O=C(O1)ON=C1C2=CC=C(I)C=C2	O=C(NC1=C(/C=N/N2CCOCC2)C=C(C=C1)[N+]([O-])=O)C3=CC=C(I)C=C3	9
A25	B9	W184	O=[N+](C1=CC=CC=C1/C=N/N2CCOCC2)[O-]	O=C(O1)ON=C1C2=CC=C(I)C=C2	O=C(NC1=C(/C=N/N2CCOCC2)C([N+]([O-])=O)=CC=C1)C3=CC=C(I)C=C3	70
A26	B9	W185	C=CC1=CC=C(/C=N/N2CCOCC2)C=C1	O=C(O1)ON=C1C2=CC=C(I)C=C2	O=C(NC1=CC(C=C)=CC=C1/C=N/N2CCOCC2)C3=CC=C(I)C=C3	28
A27	B9	W186	CC1=C(/C=N/N2CCOCC2)C=CC=C1C	O=C(O1)ON=C1C2=CC=C(I)C=C2	O=C(NC1=CC=C(C)C(C)=C1/C=N/N2CCOCC2)C3=CC=C(I)C=C3	60
A28	B9	W187	CC1=CC(C)=CC(/C=N/N2CCOCC2)=C1	O=C(O1)ON=C1C2=CC=C(I)C=C2	O=C(NC1=C(/C=N/N2CCOCC2)C=C(C)C=C1C)C3=CC=C(I)C=C3	33
A29	B9	W188	C12=CC(/C=N/N3CCOCC3)=CC=C1OCC2	O=C(O1)ON=C1C2=CC=C(I)C=C2	O=C(NC1=C(/C=N/N2CCOCC2)C=C(CCO3)C3=C1)C4=CC=C(I)C=C4	23
A30	B9	W189	C1(C=CC=C2)=C2C=CC=C1/C=N\N3CCOCC3	O=C(O1)ON=C1C2=CC=C(I)C=C2	O=C(NC1=C(/C=N\N2CCOCC2)C(C=CC=C3)=C3C=C1)C4=CC=C(I)C=C4	53
A1	B10	W190	C1(/C=N/N2CCOCC2)=CC=CC=C1	O=C(O1)ON=C1C2=CC=C(C(F)(F)F)C=C2	O=C(NC1=CC=CC=C1/C=N/N2CCOCC2)C3=CC=C(C(F)(F)F)C=C3	70
A2	B10	W191	CC1=CC=C(/C=N/N2CCOCC2)C=C1	O=C(O1)ON=C1C2=CC=C(C(F)(F)F)C=C2	O=C(NC1=CC(C)=CC=C1/C=N/N2CCOCC2)C3=CC=C(C(F)(F)F)C=C3	67
A3	B10	W192	CC1=CC=CC(/C=N/N2CCOCC2)=C1	O=C(O1)ON=C1C2=CC=C(C(F)(F)F)C=C2	O=C(NC1=CC=C(C)C=C1/C=N/N2CCOCC2)C3=CC=C(C(F)(F)F)C=C3	70
A4	B10	W193	CC1=C(/C=N/N2CCOCC2)C=CC=C1	O=C(O1)ON=C1C2=CC=C(C(F)(F)F)C=C2	O=C(NC1=C(/C=N/N2CCOCC2)C(C)=CC=C1)C3=CC=C(C(F)(F)F)C=C3	72
A5	B10	W194	CCC1=CC=C(/C=N/N2CCOCC2)C=C1	O=C(O1)ON=C1C2=CC=C(C(F)(F)F)C=C2	O=C(NC1=CC(CC)=CC=C1/C=N/N2CCOCC2)C3=CC=C(C(F)(F)F)C=C3	66
A6	B10	W195	CC(C)C1=CC=C(/C=N/N2CCOCC2)C=C1	O=C(O1)ON=C1C2=CC=C(C(F)(F)F)C=C2	O=C(NC1=CC(C(C)C)=CC=C1/C=N/N2CCOCC2)C3=CC=C(C(F)(F)F)C=C3	59
A8	B10	W196	COC1=CC=C(/C=N/N2CCOCC2)C=C1	O=C(O1)ON=C1C2=CC=C(C(F)(F)F)C=C2	O=C(NC1=CC(OC)=CC=C1/C=N/N2CCOCC2)C3=CC=C(C(F)(F)F)C=C3	36
A9	B10	W197	COC1=C(/C=N/N2CCOCC2)C=CC=C1	O=C(O1)ON=C1C2=CC=C(C(F)(F)F)C=C2	O=C(NC1=C(/C=N/N2CCOCC2)C(OC)=CC=C1)C3=CC=C(C(F)(F)F)C=C3	3
A11	B10	W198	FC1=CC=C(/C=N/N2CCOCC2)C=C1	O=C(O1)ON=C1C2=CC=C(C(F)(F)F)C=C2	O=C(NC1=C(/C=N/N2CCOCC2)C=CC(F)=C1)C3=CC=C(C(F)(F)F)C=C3	34
A12	B10	W199	FC1=CC(/C=N/N2CCOCC2)=CC=C1	O=C(O1)ON=C1C2=CC=C(C(F)(F)F)C=C2	O=C(NC1=C(/C=N/N2CCOCC2)C=C(F)C=C1)C3=CC=C(C(F)(F)F)C=C3	18
A13	B10	W200	FC1=C(/C=N/N2CCOCC2)C=CC=C1	O=C(O1)ON=C1C2=CC=C(C(F)(F)F)C=C2	O=C(NC1=CC=CC(F)=C1/C=N/N2CCOCC2)C3=CC=C(C(F)(F)F)C=C3	69
A14	B10	W201	ClC1=CC=C(/C=N/N2CCOCC2)C=C1	O=C(O1)ON=C1C2=CC=C(C(F)(F)F)C=C2	O=C(NC1=CC(Cl)=CC=C1/C=N/N2CCOCC2)C3=CC=C(C(F)(F)F)C=C3	69
A15	B10	W202	BrC1=CC=C(/C=N/N2CCOCC2)C=C1	O=C(O1)ON=C1C2=CC=C(C(F)(F)F)C=C2	O=C(NC1=CC(Br)=CC=C1/C=N/N2CCOCC2)C3=CC=C(C(F)(F)F)C=C3	32
A16	B10	W203	BrC1=C(/C=N/N2CCOCC2)C=CC=C1	O=C(O1)ON=C1C2=CC=C(C(F)(F)F)C=C2	O=C(NC1=CC=CC(Br)=C1/C=N/N2CCOCC2)C3=CC=C(C(F)(F)F)C=C3	23
A17	B10	W204	FC(C1=CC=CC(/C=N/N2CCOCC2)=C1)(F)F	O=C(O1)ON=C1C2=CC=C(C(F)(F)F)C=C2	O=C(NC1=CC=C(C(F)(F)F)C=C1/C=N/N2CCOCC2)C3=CC=C(C(F)(F)F)C=C3	48
A19	B10	W205	OC(C=C1)=CC=C1/C=N/N2CCOCC2	O=C(O1)ON=C1C2=CC=C(C(F)(F)F)C=C2	O=C(NC1=CC(O)=CC=C1/C=N/N2CCOCC2)C3=CC=C(C(F)(F)F)C=C3	5
A20	B10	W206	OC(C=CC=C1)=C1/C=N/N2CCOCC2	O=C(O1)ON=C1C2=CC=C(C(F)(F)F)C=C2	O=C(NC1=CC=CC(O)=C1/C=N/N2CCOCC2)C3=CC=C(C(F)(F)F)C=C3	12
A21	B10	W207	O=C(C1=CC=C(/C=N/N2CCOCC2)C=C1)OC	O=C(O1)ON=C1C2=CC=C(C(F)(F)F)C=C2	O=C(NC1=CC(C(OC)=O)=CC=C1/C=N/N2CCOCC2)C3=CC=C(C(F)(F)F)C=C3	43
A22	B10	W208	N#CC1=CC=C(/C=N/N2CCOCC2)C=C1	O=C(O1)ON=C1C2=CC=C(C(F)(F)F)C=C2	O=C(NC1=CC(C#N)=CC=C1/C=N/N2CCOCC2)C3=CC=C(C(F)(F)F)C=C3	22
A23	B10	W209	O=S(C1=CC=C(/C=N/N2CCOCC2)C=C1)(C)=O	O=C(O1)ON=C1C2=CC=C(C(F)(F)F)C=C2	O=C(NC1=CC(S(=O)(C)=O)=CC=C1/C=N/N2CCOCC2)C3=CC=C(C(F)(F)F)C=C3	48
A24	B10	W210	O=[N+](C1=CC(/C=N/N2CCOCC2)=CC=C1)[O-]	O=C(O1)ON=C1C2=CC=C(C(F)(F)F)C=C2	O=C(NC1=C(/C=N/N2CCOCC2)C=C(C=C1)[N+]([O-])=O)C3=CC=C(C(F)(F)F)C=C3	43
A25	B10	W211	O=[N+](C1=CC=CC=C1/C=N/N2CCOCC2)[O-]	O=C(O1)ON=C1C2=CC=C(C(F)(F)F)C=C2	O=C(NC1=C(/C=N/N2CCOCC2)C([N+]([O-])=O)=CC=C1)C3=CC=C(C(F)(F)F)C=C3	70
A26	B10	W212	C=CC1=CC=C(/C=N/N2CCOCC2)C=C1	O=C(O1)ON=C1C2=CC=C(C(F)(F)F)C=C2	O=C(NC1=CC(C=C)=CC=C1/C=N/N2CCOCC2)C3=CC=C(C(F)(F)F)C=C3	27
A27	B10	W213	CC1=C(/C=N/N2CCOCC2)C=CC=C1C	O=C(O1)ON=C1C2=CC=C(C(F)(F)F)C=C2	O=C(NC1=CC=C(C)C(C)=C1/C=N/N2CCOCC2)C3=CC=C(C(F)(F)F)C=C3	59
A28	B10	W214	CC1=CC(C)=CC(/C=N/N2CCOCC2)=C1	O=C(O1)ON=C1C2=CC=C(C(F)(F)F)C=C2	O=C(NC1=C(/C=N/N2CCOCC2)C=C(C)C=C1C)C3=CC=C(C(F)(F)F)C=C3	40
A29	B10	W215	C12=CC(/C=N/N3CCOCC3)=CC=C1OCC2	O=C(O1)ON=C1C2=CC=C(C(F)(F)F)C=C2	O=C(NC1=C(/C=N/N2CCOCC2)C=C(CCO3)C3=C1)C4=CC=C(C(F)(F)F)C=C4	38
A30	B10	W216	C1(C=CC=C2)=C2C=CC=C1/C=N\N3CCOCC3	O=C(O1)ON=C1C2=CC=C(C(F)(F)F)C=C2	O=C(NC1=C(/C=N\N2CCOCC2)C(C=CC=C3)=C3C=C1)C4=CC=C(C(F)(F)F)C=C4	55
A1	B11	W217	C1(/C=N/N2CCOCC2)=CC=CC=C1	O=C(O1)ON=C1C2=CC=C(C(OC)=O)C=C2	O=C(NC1=CC=CC=C1/C=N/N2CCOCC2)C3=CC=C(C(OC)=O)C=C3	6
A2	B11	W218	CC1=CC=C(/C=N/N2CCOCC2)C=C1	O=C(O1)ON=C1C2=CC=C(C(OC)=O)C=C2	O=C(NC1=CC(C)=CC=C1/C=N/N2CCOCC2)C3=CC=C(C(OC)=O)C=C3	6
A3	B11	W219	CC1=CC=CC(/C=N/N2CCOCC2)=C1	O=C(O1)ON=C1C2=CC=C(C(OC)=O)C=C2	O=C(NC1=CC=C(C)C=C1/C=N/N2CCOCC2)C3=CC=C(C(OC)=O)C=C3	5
A4	B11	W220	CC1=C(/C=N/N2CCOCC2)C=CC=C1	O=C(O1)ON=C1C2=CC=C(C(OC)=O)C=C2	O=C(NC1=C(/C=N/N2CCOCC2)C(C)=CC=C1)C3=CC=C(C(OC)=O)C=C3	5
A5	B11	W221	CCC1=CC=C(/C=N/N2CCOCC2)C=C1	O=C(O1)ON=C1C2=CC=C(C(OC)=O)C=C2	O=C(NC1=CC(CC)=CC=C1/C=N/N2CCOCC2)C3=CC=C(C(OC)=O)C=C3	6
A6	B11	W222	CC(C)C1=CC=C(/C=N/N2CCOCC2)C=C1	O=C(O1)ON=C1C2=CC=C(C(OC)=O)C=C2	O=C(NC1=CC(C(C)C)=CC=C1/C=N/N2CCOCC2)C3=CC=C(C(OC)=O)C=C3	4
A8	B11	W223	COC1=CC=C(/C=N/N2CCOCC2)C=C1	O=C(O1)ON=C1C2=CC=C(C(OC)=O)C=C2	O=C(NC1=CC(OC)=CC=C1/C=N/N2CCOCC2)C3=CC=C(C(OC)=O)C=C3	5
A9	B11	W224	COC1=C(/C=N/N2CCOCC2)C=CC=C1	O=C(O1)ON=C1C2=CC=C(C(OC)=O)C=C2	O=C(NC1=C(/C=N/N2CCOCC2)C(OC)=CC=C1)C3=CC=C(C(OC)=O)C=C3	2
A11	B11	W225	FC1=CC=C(/C=N/N2CCOCC2)C=C1	O=C(O1)ON=C1C2=CC=C(C(OC)=O)C=C2	O=C(NC1=C(/C=N/N2CCOCC2)C=CC(F)=C1)C3=CC=C(C(OC)=O)C=C3	4
A12	B11	W226	FC1=CC(/C=N/N2CCOCC2)=CC=C1	O=C(O1)ON=C1C2=CC=C(C(OC)=O)C=C2	O=C(NC1=C(/C=N/N2CCOCC2)C=C(F)C=C1)C3=CC=C(C(OC)=O)C=C3	5
A13	B11	W227	FC1=C(/C=N/N2CCOCC2)C=CC=C1	O=C(O1)ON=C1C2=CC=C(C(OC)=O)C=C2	O=C(NC1=CC=CC(F)=C1/C=N/N2CCOCC2)C3=CC=C(C(OC)=O)C=C3	4
A14	B11	W228	ClC1=CC=C(/C=N/N2CCOCC2)C=C1	O=C(O1)ON=C1C2=CC=C(C(OC)=O)C=C2	O=C(NC1=CC(Cl)=CC=C1/C=N/N2CCOCC2)C3=CC=C(C(OC)=O)C=C3	4
A15	B11	W229	BrC1=CC=C(/C=N/N2CCOCC2)C=C1	O=C(O1)ON=C1C2=CC=C(C(OC)=O)C=C2	O=C(NC1=CC(Br)=CC=C1/C=N/N2CCOCC2)C3=CC=C(C(OC)=O)C=C3	0
A16	B11	W230	BrC1=C(/C=N/N2CCOCC2)C=CC=C1	O=C(O1)ON=C1C2=CC=C(C(OC)=O)C=C2	O=C(NC1=CC=CC(Br)=C1/C=N/N2CCOCC2)C3=CC=C(C(OC)=O)C=C3	3
A17	B11	W231	FC(C1=CC=CC(/C=N/N2CCOCC2)=C1)(F)F	O=C(O1)ON=C1C2=CC=C(C(OC)=O)C=C2	O=C(NC1=CC=C(C(F)(F)F)C=C1/C=N/N2CCOCC2)C3=CC=C(C(OC)=O)C=C3	7
A19	B11	W232	OC(C=C1)=CC=C1/C=N/N2CCOCC2	O=C(O1)ON=C1C2=CC=C(C(OC)=O)C=C2	O=C(NC1=CC(O)=CC=C1/C=N/N2CCOCC2)C3=CC=C(C(OC)=O)C=C3	3
A20	B11	W233	OC(C=CC=C1)=C1/C=N/N2CCOCC2	O=C(O1)ON=C1C2=CC=C(C(OC)=O)C=C2	O=C(NC1=CC=CC(O)=C1/C=N/N2CCOCC2)C3=CC=C(C(OC)=O)C=C3	2
A21	B11	W234	O=C(C1=CC=C(/C=N/N2CCOCC2)C=C1)OC	O=C(O1)ON=C1C2=CC=C(C(OC)=O)C=C2	O=C(NC1=CC(C(OC)=O)=CC=C1/C=N/N2CCOCC2)C3=CC=C(C(OC)=O)C=C3	8
A22	B11	W235	N#CC1=CC=C(/C=N/N2CCOCC2)C=C1	O=C(O1)ON=C1C2=CC=C(C(OC)=O)C=C2	O=C(NC1=CC(C#N)=CC=C1/C=N/N2CCOCC2)C3=CC=C(C(OC)=O)C=C3	2
A23	B11	W236	O=S(C1=CC=C(/C=N/N2CCOCC2)C=C1)(C)=O	O=C(O1)ON=C1C2=CC=C(C(OC)=O)C=C2	O=C(NC1=CC(S(=O)(C)=O)=CC=C1/C=N/N2CCOCC2)C3=CC=C(C(OC)=O)C=C3	2
A24	B11	W237	O=[N+](C1=CC(/C=N/N2CCOCC2)=CC=C1)[O-]	O=C(O1)ON=C1C2=CC=C(C(OC)=O)C=C2	O=C(NC1=C(/C=N/N2CCOCC2)C=C(C=C1)[N+]([O-])=O)C3=CC=C(C(OC)=O)C=C3	2
A25	B11	W238	O=[N+](C1=CC=CC=C1/C=N/N2CCOCC2)[O-]	O=C(O1)ON=C1C2=CC=C(C(OC)=O)C=C2	O=C(NC1=C(/C=N/N2CCOCC2)C([N+]([O-])=O)=CC=C1)C3=CC=C(C(OC)=O)C=C3	4
A26	B11	W239	C=CC1=CC=C(/C=N/N2CCOCC2)C=C1	O=C(O1)ON=C1C2=CC=C(C(OC)=O)C=C2	O=C(NC1=CC(C=C)=CC=C1/C=N/N2CCOCC2)C3=CC=C(C(OC)=O)C=C3	1
A27	B11	W240	CC1=C(/C=N/N2CCOCC2)C=CC=C1C	O=C(O1)ON=C1C2=CC=C(C(OC)=O)C=C2	O=C(NC1=CC=C(C)C(C)=C1/C=N/N2CCOCC2)C3=CC=C(C(OC)=O)C=C3	2
A28	B11	W241	CC1=CC(C)=CC(/C=N/N2CCOCC2)=C1	O=C(O1)ON=C1C2=CC=C(C(OC)=O)C=C2	O=C(NC1=C(/C=N/N2CCOCC2)C=C(C)C=C1C)C3=CC=C(C(OC)=O)C=C3	6
A29	B11	W242	C12=CC(/C=N/N3CCOCC3)=CC=C1OCC2	O=C(O1)ON=C1C2=CC=C(C(OC)=O)C=C2	O=C(NC1=C(/C=N/N2CCOCC2)C=C(CCO3)C3=C1)C4=CC=C(C(OC)=O)C=C4	9
A30	B11	W243	C1(C=CC=C2)=C2C=CC=C1/C=N\N3CCOCC3	O=C(O1)ON=C1C2=CC=C(C(OC)=O)C=C2	O=C(NC1=C(/C=N\N2CCOCC2)C(C=CC=C3)=C3C=C1)C4=CC=C(C(OC)=O)C=C4	3
A1	B12	W244	C1(/C=N/N2CCOCC2)=CC=CC=C1	O=C(O1)ON=C1C2=CC=C(N(C)C)C=C2	O=C(NC1=CC=CC=C1/C=N/N2CCOCC2)C3=CC=C(N(C)C)C=C3	3
A2	B12	W245	CC1=CC=C(/C=N/N2CCOCC2)C=C1	O=C(O1)ON=C1C2=CC=C(N(C)C)C=C2	O=C(NC1=CC(C)=CC=C1/C=N/N2CCOCC2)C3=CC=C(N(C)C)C=C3	0
A3	B12	W246	CC1=CC=CC(/C=N/N2CCOCC2)=C1	O=C(O1)ON=C1C2=CC=C(N(C)C)C=C2	O=C(NC1=CC=C(C)C=C1/C=N/N2CCOCC2)C3=CC=C(N(C)C)C=C3	0
A4	B12	W247	CC1=C(/C=N/N2CCOCC2)C=CC=C1	O=C(O1)ON=C1C2=CC=C(N(C)C)C=C2	O=C(NC1=C(/C=N/N2CCOCC2)C(C)=CC=C1)C3=CC=C(N(C)C)C=C3	0
A5	B12	W248	CCC1=CC=C(/C=N/N2CCOCC2)C=C1	O=C(O1)ON=C1C2=CC=C(N(C)C)C=C2	O=C(NC1=CC(CC)=CC=C1/C=N/N2CCOCC2)C3=CC=C(N(C)C)C=C3	0
A6	B12	W249	CC(C)C1=CC=C(/C=N/N2CCOCC2)C=C1	O=C(O1)ON=C1C2=CC=C(N(C)C)C=C2	O=C(NC1=CC(C(C)C)=CC=C1/C=N/N2CCOCC2)C3=CC=C(N(C)C)C=C3	0
A8	B12	W250	COC1=CC=C(/C=N/N2CCOCC2)C=C1	O=C(O1)ON=C1C2=CC=C(N(C)C)C=C2	O=C(NC1=CC(OC)=CC=C1/C=N/N2CCOCC2)C3=CC=C(N(C)C)C=C3	0
A9	B12	W251	COC1=C(/C=N/N2CCOCC2)C=CC=C1	O=C(O1)ON=C1C2=CC=C(N(C)C)C=C2	O=C(NC1=C(/C=N/N2CCOCC2)C(OC)=CC=C1)C3=CC=C(N(C)C)C=C3	1
A11	B12	W252	FC1=CC=C(/C=N/N2CCOCC2)C=C1	O=C(O1)ON=C1C2=CC=C(N(C)C)C=C2	O=C(NC1=C(/C=N/N2CCOCC2)C=CC(F)=C1)C3=CC=C(N(C)C)C=C3	2
A12	B12	W253	FC1=CC(/C=N/N2CCOCC2)=CC=C1	O=C(O1)ON=C1C2=CC=C(N(C)C)C=C2	O=C(NC1=C(/C=N/N2CCOCC2)C=C(F)C=C1)C3=CC=C(N(C)C)C=C3	0
A13	B12	W254	FC1=C(/C=N/N2CCOCC2)C=CC=C1	O=C(O1)ON=C1C2=CC=C(N(C)C)C=C2	O=C(NC1=CC=CC(F)=C1/C=N/N2CCOCC2)C3=CC=C(N(C)C)C=C3	0
A14	B12	W255	ClC1=CC=C(/C=N/N2CCOCC2)C=C1	O=C(O1)ON=C1C2=CC=C(N(C)C)C=C2	O=C(NC1=CC(Cl)=CC=C1/C=N/N2CCOCC2)C3=CC=C(N(C)C)C=C3	0
A15	B12	W256	BrC1=CC=C(/C=N/N2CCOCC2)C=C1	O=C(O1)ON=C1C2=CC=C(N(C)C)C=C2	O=C(NC1=CC(Br)=CC=C1/C=N/N2CCOCC2)C3=CC=C(N(C)C)C=C3	0
A16	B12	W257	BrC1=C(/C=N/N2CCOCC2)C=CC=C1	O=C(O1)ON=C1C2=CC=C(N(C)C)C=C2	O=C(NC1=CC=CC(Br)=C1/C=N/N2CCOCC2)C3=CC=C(N(C)C)C=C3	0
A17	B12	W258	FC(C1=CC=CC(/C=N/N2CCOCC2)=C1)(F)F	O=C(O1)ON=C1C2=CC=C(N(C)C)C=C2	O=C(NC1=CC=C(C(F)(F)F)C=C1/C=N/N2CCOCC2)C3=CC=C(N(C)C)C=C3	0
A19	B12	W259	OC(C=C1)=CC=C1/C=N/N2CCOCC2	O=C(O1)ON=C1C2=CC=C(N(C)C)C=C2	O=C(NC1=CC(O)=CC=C1/C=N/N2CCOCC2)C3=CC=C(N(C)C)C=C3	0
A20	B12	W260	OC(C=CC=C1)=C1/C=N/N2CCOCC2	O=C(O1)ON=C1C2=CC=C(N(C)C)C=C2	O=C(NC1=CC=CC(O)=C1/C=N/N2CCOCC2)C3=CC=C(N(C)C)C=C3	0
A21	B12	W261	O=C(C1=CC=C(/C=N/N2CCOCC2)C=C1)OC	O=C(O1)ON=C1C2=CC=C(N(C)C)C=C2	O=C(NC1=CC(C(OC)=O)=CC=C1/C=N/N2CCOCC2)C3=CC=C(N(C)C)C=C3	2
A22	B12	W262	N#CC1=CC=C(/C=N/N2CCOCC2)C=C1	O=C(O1)ON=C1C2=CC=C(N(C)C)C=C2	O=C(NC1=CC(C#N)=CC=C1/C=N/N2CCOCC2)C3=CC=C(N(C)C)C=C3	0
A23	B12	W263	O=S(C1=CC=C(/C=N/N2CCOCC2)C=C1)(C)=O	O=C(O1)ON=C1C2=CC=C(N(C)C)C=C2	O=C(NC1=CC(S(=O)(C)=O)=CC=C1/C=N/N2CCOCC2)C3=CC=C(N(C)C)C=C3	0
A24	B12	W264	O=[N+](C1=CC(/C=N/N2CCOCC2)=CC=C1)[O-]	O=C(O1)ON=C1C2=CC=C(N(C)C)C=C2	O=C(NC1=C(/C=N/N2CCOCC2)C=C(C=C1)[N+]([O-])=O)C3=CC=C(N(C)C)C=C3	0
A25	B12	W265	O=[N+](C1=CC=CC=C1/C=N/N2CCOCC2)[O-]	O=C(O1)ON=C1C2=CC=C(N(C)C)C=C2	O=C(NC1=C(/C=N/N2CCOCC2)C([N+]([O-])=O)=CC=C1)C3=CC=C(N(C)C)C=C3	0
A26	B12	W266	C=CC1=CC=C(/C=N/N2CCOCC2)C=C1	O=C(O1)ON=C1C2=CC=C(N(C)C)C=C2	O=C(NC1=CC(C=C)=CC=C1/C=N/N2CCOCC2)C3=CC=C(N(C)C)C=C3	0
A27	B12	W267	CC1=C(/C=N/N2CCOCC2)C=CC=C1C	O=C(O1)ON=C1C2=CC=C(N(C)C)C=C2	O=C(NC1=CC=C(C)C(C)=C1/C=N/N2CCOCC2)C3=CC=C(N(C)C)C=C3	0
A28	B12	W268	CC1=CC(C)=CC(/C=N/N2CCOCC2)=C1	O=C(O1)ON=C1C2=CC=C(N(C)C)C=C2	O=C(NC1=C(/C=N/N2CCOCC2)C=C(C)C=C1C)C3=CC=C(N(C)C)C=C3	0
A29	B12	W269	C12=CC(/C=N/N3CCOCC3)=CC=C1OCC2	O=C(O1)ON=C1C2=CC=C(N(C)C)C=C2	O=C(NC1=C(/C=N/N2CCOCC2)C=C(CCO3)C3=C1)C4=CC=C(N(C)C)C=C4	0
A30	B12	W270	C1(C=CC=C2)=C2C=CC=C1/C=N\N3CCOCC3	O=C(O1)ON=C1C2=CC=C(N(C)C)C=C2	O=C(NC1=C(/C=N\N2CCOCC2)C(C=CC=C3)=C3C=C1)C4=CC=C(N(C)C)C=C4	3
A1	B13	W271	C1(/C=N/N2CCOCC2)=CC=CC=C1	O=C(O1)ON=C1C2=CC=C(C=C)C=C2	O=C(NC1=CC=CC=C1/C=N/N2CCOCC2)C3=CC=C(C=C)C=C3	6
A2	B13	W272	CC1=CC=C(/C=N/N2CCOCC2)C=C1	O=C(O1)ON=C1C2=CC=C(C=C)C=C2	O=C(NC1=CC(C)=CC=C1/C=N/N2CCOCC2)C3=CC=C(C=C)C=C3	9
A3	B13	W273	CC1=CC=CC(/C=N/N2CCOCC2)=C1	O=C(O1)ON=C1C2=CC=C(C=C)C=C2	O=C(NC1=CC=C(C)C=C1/C=N/N2CCOCC2)C3=CC=C(C=C)C=C3	5
A4	B13	W274	CC1=C(/C=N/N2CCOCC2)C=CC=C1	O=C(O1)ON=C1C2=CC=C(C=C)C=C2	O=C(NC1=C(/C=N/N2CCOCC2)C(C)=CC=C1)C3=CC=C(C=C)C=C3	15
A5	B13	W275	CCC1=CC=C(/C=N/N2CCOCC2)C=C1	O=C(O1)ON=C1C2=CC=C(C=C)C=C2	O=C(NC1=CC(CC)=CC=C1/C=N/N2CCOCC2)C3=CC=C(C=C)C=C3	9
A6	B13	W276	CC(C)C1=CC=C(/C=N/N2CCOCC2)C=C1	O=C(O1)ON=C1C2=CC=C(C=C)C=C2	O=C(NC1=CC(C(C)C)=CC=C1/C=N/N2CCOCC2)C3=CC=C(C=C)C=C3	7
A8	B13	W277	COC1=CC=C(/C=N/N2CCOCC2)C=C1	O=C(O1)ON=C1C2=CC=C(C=C)C=C2	O=C(NC1=CC(OC)=CC=C1/C=N/N2CCOCC2)C3=CC=C(C=C)C=C3	6
A9	B13	W278	COC1=C(/C=N/N2CCOCC2)C=CC=C1	O=C(O1)ON=C1C2=CC=C(C=C)C=C2	O=C(NC1=C(/C=N/N2CCOCC2)C(OC)=CC=C1)C3=CC=C(C=C)C=C3	2
A11	B13	W279	FC1=CC=C(/C=N/N2CCOCC2)C=C1	O=C(O1)ON=C1C2=CC=C(C=C)C=C2	O=C(NC1=C(/C=N/N2CCOCC2)C=CC(F)=C1)C3=CC=C(C=C)C=C3	4
A12	B13	W280	FC1=CC(/C=N/N2CCOCC2)=CC=C1	O=C(O1)ON=C1C2=CC=C(C=C)C=C2	O=C(NC1=C(/C=N/N2CCOCC2)C=C(F)C=C1)C3=CC=C(C=C)C=C3	2
A13	B13	W281	FC1=C(/C=N/N2CCOCC2)C=CC=C1	O=C(O1)ON=C1C2=CC=C(C=C)C=C2	O=C(NC1=CC=CC(F)=C1/C=N/N2CCOCC2)C3=CC=C(C=C)C=C3	7
A14	B13	W282	ClC1=CC=C(/C=N/N2CCOCC2)C=C1	O=C(O1)ON=C1C2=CC=C(C=C)C=C2	O=C(NC1=CC(Cl)=CC=C1/C=N/N2CCOCC2)C3=CC=C(C=C)C=C3	6
A15	B13	W283	BrC1=CC=C(/C=N/N2CCOCC2)C=C1	O=C(O1)ON=C1C2=CC=C(C=C)C=C2	O=C(NC1=CC(Br)=CC=C1/C=N/N2CCOCC2)C3=CC=C(C=C)C=C3	6
A16	B13	W284	BrC1=C(/C=N/N2CCOCC2)C=CC=C1	O=C(O1)ON=C1C2=CC=C(C=C)C=C2	O=C(NC1=CC=CC(Br)=C1/C=N/N2CCOCC2)C3=CC=C(C=C)C=C3	8
A17	B13	W285	FC(C1=CC=CC(/C=N/N2CCOCC2)=C1)(F)F	O=C(O1)ON=C1C2=CC=C(C=C)C=C2	O=C(NC1=CC=C(C(F)(F)F)C=C1/C=N/N2CCOCC2)C3=CC=C(C=C)C=C3	4
A19	B13	W286	OC(C=C1)=CC=C1/C=N/N2CCOCC2	O=C(O1)ON=C1C2=CC=C(C=C)C=C2	O=C(NC1=CC(O)=CC=C1/C=N/N2CCOCC2)C3=CC=C(C=C)C=C3	1
A20	B13	W287	OC(C=CC=C1)=C1/C=N/N2CCOCC2	O=C(O1)ON=C1C2=CC=C(C=C)C=C2	O=C(NC1=CC=CC(O)=C1/C=N/N2CCOCC2)C3=CC=C(C=C)C=C3	7
A21	B13	W288	O=C(C1=CC=C(/C=N/N2CCOCC2)C=C1)OC	O=C(O1)ON=C1C2=CC=C(C=C)C=C2	O=C(NC1=CC(C(OC)=O)=CC=C1/C=N/N2CCOCC2)C3=CC=C(C=C)C=C3	9
A22	B13	W289	N#CC1=CC=C(/C=N/N2CCOCC2)C=C1	O=C(O1)ON=C1C2=CC=C(C=C)C=C2	O=C(NC1=CC(C#N)=CC=C1/C=N/N2CCOCC2)C3=CC=C(C=C)C=C3	2
A23	B13	W290	O=S(C1=CC=C(/C=N/N2CCOCC2)C=C1)(C)=O	O=C(O1)ON=C1C2=CC=C(C=C)C=C2	O=C(NC1=CC(S(=O)(C)=O)=CC=C1/C=N/N2CCOCC2)C3=CC=C(C=C)C=C3	2
A24	B13	W291	O=[N+](C1=CC(/C=N/N2CCOCC2)=CC=C1)[O-]	O=C(O1)ON=C1C2=CC=C(C=C)C=C2	O=C(NC1=C(/C=N/N2CCOCC2)C=C(C=C1)[N+]([O-])=O)C3=CC=C(C=C)C=C3	4
A25	B13	W292	O=[N+](C1=CC=CC=C1/C=N/N2CCOCC2)[O-]	O=C(O1)ON=C1C2=CC=C(C=C)C=C2	O=C(NC1=C(/C=N/N2CCOCC2)C([N+]([O-])=O)=CC=C1)C3=CC=C(C=C)C=C3	5
A26	B13	W293	C=CC1=CC=C(/C=N/N2CCOCC2)C=C1	O=C(O1)ON=C1C2=CC=C(C=C)C=C2	O=C(NC1=CC(C=C)=CC=C1/C=N/N2CCOCC2)C3=CC=C(C=C)C=C3	0
A27	B13	W294	CC1=C(/C=N/N2CCOCC2)C=CC=C1C	O=C(O1)ON=C1C2=CC=C(C=C)C=C2	O=C(NC1=CC=C(C)C(C)=C1/C=N/N2CCOCC2)C3=CC=C(C=C)C=C3	9
A28	B13	W295	CC1=CC(C)=CC(/C=N/N2CCOCC2)=C1	O=C(O1)ON=C1C2=CC=C(C=C)C=C2	O=C(NC1=C(/C=N/N2CCOCC2)C=C(C)C=C1C)C3=CC=C(C=C)C=C3	0
A29	B13	W296	C12=CC(/C=N/N3CCOCC3)=CC=C1OCC2	O=C(O1)ON=C1C2=CC=C(C=C)C=C2	O=C(NC1=C(/C=N/N2CCOCC2)C=C(CCO3)C3=C1)C4=CC=C(C=C)C=C4	12
A30	B13	W297	C1(C=CC=C2)=C2C=CC=C1/C=N\N3CCOCC3	O=C(O1)ON=C1C2=CC=C(C=C)C=C2	O=C(NC1=C(/C=N\N2CCOCC2)C(C=CC=C3)=C3C=C1)C4=CC=C(C=C)C=C4	13
A1	B14	W298	C1(/C=N/N2CCOCC2)=CC=CC=C1	O=C(O1)ON=C1C2=CC(C)=CC(C)=C2	O=C(NC1=CC=CC=C1/C=N/N2CCOCC2)C3=CC(C)=CC(C)=C3	34
A2	B14	W299	CC1=CC=C(/C=N/N2CCOCC2)C=C1	O=C(O1)ON=C1C2=CC(C)=CC(C)=C2	CC1=CC=C(/C=N/N2CCOCC2)C(NC(C3=CC(C)=CC(C)=C3)=O)=C1	45
A3	B14	W300	CC1=CC=CC(/C=N/N2CCOCC2)=C1	O=C(O1)ON=C1C2=CC(C)=CC(C)=C2	CC1=CC=C(NC(C2=CC(C)=CC(C)=C2)=O)C(/C=N/N3CCOCC3)=C1	43
A4	B14	W301	CC1=C(/C=N/N2CCOCC2)C=CC=C1	O=C(O1)ON=C1C2=CC(C)=CC(C)=C2	CC1=CC=CC(NC(C2=CC(C)=CC(C)=C2)=O)=C1/C=N/N3CCOCC3	41
A5	B14	W302	CCC1=CC=C(/C=N/N2CCOCC2)C=C1	O=C(O1)ON=C1C2=CC(C)=CC(C)=C2	O=C(NC1=CC(CC)=CC=C1/C=N/N2CCOCC2)C3=CC(C)=CC(C)=C3	38
A6	B14	W303	CC(C)C1=CC=C(/C=N/N2CCOCC2)C=C1	O=C(O1)ON=C1C2=CC(C)=CC(C)=C2	CC(C)C1=CC=C(/C=N/N2CCOCC2)C(NC(C3=CC(C)=CC(C)=C3)=O)=C1	40
A8	B14	W304	COC1=CC=C(/C=N/N2CCOCC2)C=C1	O=C(O1)ON=C1C2=CC(C)=CC(C)=C2	O=C(NC1=CC(OC)=CC=C1/C=N/N2CCOCC2)C3=CC(C)=CC(C)=C3	55
A9	B14	W305	COC1=C(/C=N/N2CCOCC2)C=CC=C1	O=C(O1)ON=C1C2=CC(C)=CC(C)=C2	O=C(NC1=C(/C=N/N2CCOCC2)C(OC)=CC=C1)C3=CC=CC(C)=C3	1
A11	B14	W306	FC1=CC=C(/C=N/N2CCOCC2)C=C1	O=C(O1)ON=C1C2=CC(C)=CC(C)=C2	FC1=CC(NC(C2=CC(C)=CC(C)=C2)=O)=C(/C=N/N3CCOCC3)C=C1	23
A12	B14	W307	FC1=CC(/C=N/N2CCOCC2)=CC=C1	O=C(O1)ON=C1C2=CC(C)=CC(C)=C2	FC1=CC(/C=N/N2CCOCC2)=C(NC(C3=CC(C)=CC(C)=C3)=O)C=C1	14
A13	B14	W308	FC1=C(/C=N/N2CCOCC2)C=CC=C1	O=C(O1)ON=C1C2=CC(C)=CC(C)=C2	FC1=C(/C=N/N2CCOCC2)C(NC(C3=CC(C)=CC(C)=C3)=O)=CC=C1	26
A14	B14	W309	ClC1=CC=C(/C=N/N2CCOCC2)C=C1	O=C(O1)ON=C1C2=CC(C)=CC(C)=C2	ClC1=CC=C(/C=N/N2CCOCC2)C(NC(C3=CC(C)=CC(C)=C3)=O)=C1	29
A15	B14	W310	BrC1=CC=C(/C=N/N2CCOCC2)C=C1	O=C(O1)ON=C1C2=CC(C)=CC(C)=C2	BrC1=CC=C(/C=N/N2CCOCC2)C(NC(C3=CC(C)=CC(C)=C3)=O)=C1	25
A16	B14	W311	BrC1=C(/C=N/N2CCOCC2)C=CC=C1	O=C(O1)ON=C1C2=CC(C)=CC(C)=C2	BrC1=C(/C=N/N2CCOCC2)C(NC(C3=CC(C)=CC(C)=C3)=O)=CC=C1	23
A17	B14	W312	FC(C1=CC=CC(/C=N/N2CCOCC2)=C1)(F)F	O=C(O1)ON=C1C2=CC(C)=CC(C)=C2	O=C(NC1=CC=C(C(F)(F)F)C=C1/C=N/N2CCOCC2)C3=CC(C)=CC(C)=C3	31
A19	B14	W313	OC(C=C1)=CC=C1/C=N/N2CCOCC2	O=C(O1)ON=C1C2=CC(C)=CC(C)=C2	OC(C=C1NC(C2=CC(C)=CC(C)=C2)=O)=CC=C1/C=N/N3CCOCC3	1
A20	B14	W314	OC(C=CC=C1)=C1/C=N/N2CCOCC2	O=C(O1)ON=C1C2=CC(C)=CC(C)=C2	OC(C=CC=C1NC(C2=CC(C)=CC(C)=C2)=O)=C1/C=N/N3CCOCC3	1
A21	B14	W315	O=C(C1=CC=C(/C=N/N2CCOCC2)C=C1)OC	O=C(O1)ON=C1C2=CC(C)=CC(C)=C2	O=C(NC1=CC(C(OC)=O)=CC=C1/C=N/N2CCOCC2)C3=CC(C)=CC(C)=C3	24
A22	B14	W316	N#CC1=CC=C(/C=N/N2CCOCC2)C=C1	O=C(O1)ON=C1C2=CC(C)=CC(C)=C2	O=C(NC1=CC(C#N)=CC=C1/C=N/N2CCOCC2)C3=CC(C)=CC(C)=C3	2
A23	B14	W317	O=S(C1=CC=C(/C=N/N2CCOCC2)C=C1)(C)=O	O=C(O1)ON=C1C2=CC(C)=CC(C)=C2	O=S(C1=CC=C(/C=N/N2CCOCC2)C(NC(C3=CC(C)=CC(C)=C3)=O)=C1)(C)=O	26
A24	B14	W318	O=[N+](C1=CC(/C=N/N2CCOCC2)=CC=C1)[O-]	O=C(O1)ON=C1C2=CC(C)=CC(C)=C2	O=C(NC1=C(/C=N/N2CCOCC2)C=C(C=C1)[N+]([O-])=O)C3=CC(C)=CC(C)=C3	10
A25	B14	W319	O=[N+](C1=CC=CC=C1/C=N/N2CCOCC2)[O-]	O=C(O1)ON=C1C2=CC(C)=CC(C)=C2	O=C(NC1=C(/C=N/N2CCOCC2)C([N+]([O-])=O)=CC=C1)C3=CC(C)=CC(C)=C3	24
A26	B14	W320	C=CC1=CC=C(/C=N/N2CCOCC2)C=C1	O=C(O1)ON=C1C2=CC(C)=CC(C)=C2	C=CC1=CC=C(/C=N/N2CCOCC2)C(NC(C3=CC(C)=CC(C)=C3)=O)=C1	2
A27	B14	W321	CC1=C(/C=N/N2CCOCC2)C=CC=C1C	O=C(O1)ON=C1C2=CC(C)=CC(C)=C2	CC1=C(/C=N/N2CCOCC2)C(NC(C3=CC(C)=CC(C)=C3)=O)=CC=C1C	49
A28	B14	W322	CC1=CC(C)=CC(/C=N/N2CCOCC2)=C1	O=C(O1)ON=C1C2=CC(C)=CC(C)=C2	CC1=CC(C)=CC(/C=N/N2CCOCC2)=C1NC(C3=CC(C)=CC(C)=C3)=O	3
A29	B14	W323	C12=CC(/C=N/N3CCOCC3)=CC=C1OCC2	O=C(O1)ON=C1C2=CC(C)=CC(C)=C2	O=C(NC1=C(/C=N/N2CCOCC2)C=C(CCO3)C3=C1)C4=CC(C)=CC(C)=C4	41
A30	B14	W324	C1(C=CC=C2)=C2C=CC=C1/C=N\N3CCOCC3	O=C(O1)ON=C1C2=CC(C)=CC(C)=C2	O=C(NC1=C(/C=N\N2CCOCC2)C(C=CC=C3)=C3C=C1)C4=CC(C)=CC(C)=C4	40
A1	B15	W325	C1(/C=N/N2CCOCC2)=CC=CC=C1	O=C(O1)ON=C1C2=CC(F)=CC(F)=C2	O=C(NC1=CC=CC=C1/C=N/N2CCOCC2)C3=CC(F)=CC(F)=C3	54
A2	B15	W326	CC1=CC=C(/C=N/N2CCOCC2)C=C1	O=C(O1)ON=C1C2=CC(F)=CC(F)=C2	CC1=CC=C(/C=N/N2CCOCC2)C(NC(C3=CC(F)=CC(F)=C3)=O)=C1	76
A3	B15	W327	CC1=CC=CC(/C=N/N2CCOCC2)=C1	O=C(O1)ON=C1C2=CC(F)=CC(F)=C2	CC1=CC=C(NC(C2=CC(F)=CC(F)=C2)=O)C(/C=N/N3CCOCC3)=C1	72
A4	B15	W328	CC1=C(/C=N/N2CCOCC2)C=CC=C1	O=C(O1)ON=C1C2=CC(F)=CC(F)=C2	CC1=CC=CC(NC(C2=CC(F)=CC(F)=C2)=O)=C1/C=N/N3CCOCC3	89
A5	B15	W329	CCC1=CC=C(/C=N/N2CCOCC2)C=C1	O=C(O1)ON=C1C2=CC(F)=CC(F)=C2	O=C(NC1=CC(CC)=CC=C1/C=N/N2CCOCC2)C3=CC(F)=CC(F)=C3	76
A6	B15	W330	CC(C)C1=CC=C(/C=N/N2CCOCC2)C=C1	O=C(O1)ON=C1C2=CC(F)=CC(F)=C2	CC(C)C1=CC=C(/C=N/N2CCOCC2)C(NC(C3=CC(F)=CC(F)=C3)=O)=C1	80
A8	B15	W331	COC1=CC=C(/C=N/N2CCOCC2)C=C1	O=C(O1)ON=C1C2=CC(F)=CC(F)=C2	O=C(NC1=CC(OC)=CC=C1/C=N/N2CCOCC2)C3=CC(F)=CC(F)=C3	45
A9	B15	W332	COC1=C(/C=N/N2CCOCC2)C=CC=C1	O=C(O1)ON=C1C2=CC(F)=CC(F)=C2	O=C(NC1=C(/C=N/N2CCOCC2)C(OC)=CC=C1)C3=CC(F)=CC(F)=C3	1
A11	B15	W333	FC1=CC=C(/C=N/N2CCOCC2)C=C1	O=C(O1)ON=C1C2=CC(F)=CC(F)=C2	FC1=CC(NC(C2=CC(F)=CC(F)=C2)=O)=C(/C=N/N3CCOCC3)C=C1	23
A12	B15	W334	FC1=CC(/C=N/N2CCOCC2)=CC=C1	O=C(O1)ON=C1C2=CC(F)=CC(F)=C2	FC1=CC(/C=N/N2CCOCC2)=C(NC(C3=CC(F)=CC(F)=C3)=O)C=C1	27
A13	B15	W335	FC1=C(/C=N/N2CCOCC2)C=CC=C1	O=C(O1)ON=C1C2=CC(F)=CC(F)=C2	FC1=C(/C=N/N2CCOCC2)C(NC(C3=CC(F)=CC(F)=C3)=O)=CC=C1	85
A14	B15	W336	ClC1=CC=C(/C=N/N2CCOCC2)C=C1	O=C(O1)ON=C1C2=CC(F)=CC(F)=C2	ClC1=CC=C(/C=N/N2CCOCC2)C(NC(C3=CC(F)=CC(F)=C3)=O)=C1	80
A15	B15	W337	BrC1=CC=C(/C=N/N2CCOCC2)C=C1	O=C(O1)ON=C1C2=CC(F)=CC(F)=C2	BrC1=CC=C(/C=N/N2CCOCC2)C(NC(C3=CC(F)=CC(F)=C3)=O)=C1	75
A16	B15	W338	BrC1=C(/C=N/N2CCOCC2)C=CC=C1	O=C(O1)ON=C1C2=CC(F)=CC(F)=C2	BrC1=C(/C=N/N2CCOCC2)C(NC(C3=CC(F)=CC(F)=C3)=O)=CC=C1	77
A17	B15	W339	FC(C1=CC=CC(/C=N/N2CCOCC2)=C1)(F)F	O=C(O1)ON=C1C2=CC(F)=CC(F)=C2	O=C(NC1=CC=C(C(F)(F)F)C=C1/C=N/N2CCOCC2)C3=CC(F)=CC(F)=C3	63
A19	B15	W340	OC(C=C1)=CC=C1/C=N/N2CCOCC2	O=C(O1)ON=C1C2=CC(F)=CC(F)=C2	OC(C=C1NC(C2=CC(F)=CC(F)=C2)=O)=CC=C1/C=N/N3CCOCC3	0
A20	B15	W341	OC(C=CC=C1)=C1/C=N/N2CCOCC2	O=C(O1)ON=C1C2=CC(F)=CC(F)=C2	OC(C=CC=C1NC(C2=CC(F)=CC(F)=C2)=O)=C1/C=N/N3CCOCC3	3
A21	B15	W342	O=C(C1=CC=C(/C=N/N2CCOCC2)C=C1)OC	O=C(O1)ON=C1C2=CC(F)=CC(F)=C2	O=C(NC1=CC(C(OC)=O)=CC=C1/C=N/N2CCOCC2)C3=CC(F)=CC(F)=C3	71
A22	B15	W343	N#CC1=CC=C(/C=N/N2CCOCC2)C=C1	O=C(O1)ON=C1C2=CC(F)=CC(F)=C2	O=C(NC1=CC(C#N)=CC=C1/C=N/N2CCOCC2)C3=CC(F)=CC(F)=C3	13
A23	B15	W344	O=S(C1=CC=C(/C=N/N2CCOCC2)C=C1)(C)=O	O=C(O1)ON=C1C2=CC(F)=CC(F)=C2	O=S(C1=CC=C(/C=N/N2CCOCC2)C(NC(C3=CC(F)=CC(F)=C3)=O)=C1)(C)=O	84
A24	B15	W345	O=[N+](C1=CC(/C=N/N2CCOCC2)=CC=C1)[O-]	O=C(O1)ON=C1C2=CC(F)=CC(F)=C2	O=C(NC1=C(/C=N/N2CCOCC2)C=C(C=C1)[N+]([O-])=O)C3=CC(F)=CC(F)=C3	38
A25	B15	W346	O=[N+](C1=CC=CC=C1/C=N/N2CCOCC2)[O-]	O=C(O1)ON=C1C2=CC(F)=CC(F)=C2	O=C(NC1=C(/C=N/N2CCOCC2)C([N+]([O-])=O)=CC=C1)C3=CC(F)=CC(F)=C3	62
A26	B15	W347	C=CC1=CC=C(/C=N/N2CCOCC2)C=C1	O=C(O1)ON=C1C2=CC(F)=CC(F)=C2	C=CC1=CC=C(/C=N/N2CCOCC2)C(NC(C3=CC(F)=CC(F)=C3)=O)=C1	35
A27	B15	W348	CC1=C(/C=N/N2CCOCC2)C=CC=C1C	O=C(O1)ON=C1C2=CC(F)=CC(F)=C2	CC1=C(/C=N/N2CCOCC2)C(NC(C3=CC(F)=CC(F)=C3)=O)=CC=C1C	67
A28	B15	W349	CC1=CC(C)=CC(/C=N/N2CCOCC2)=C1	O=C(O1)ON=C1C2=CC(F)=CC(F)=C2	CC1=CC(C)=CC(/C=N/N2CCOCC2)=C1NC(C3=CC(F)=CC(F)=C3)=O	54
A29	B15	W350	C12=CC(/C=N/N3CCOCC3)=CC=C1OCC2	O=C(O1)ON=C1C2=CC(F)=CC(F)=C2	O=C(NC1=C(/C=N/N2CCOCC2)C=C(CCO3)C3=C1)C4=CC(F)=CC(F)=C4	39
A30	B15	W351	C1(C=CC=C2)=C2C=CC=C1/C=N\N3CCOCC3	O=C(O1)ON=C1C2=CC(F)=CC(F)=C2	O=C(NC1=C(/C=N\N2CCOCC2)C(C=CC=C3)=C3C=C1)C4=CC(F)=CC(F)=C4	46
A1	B16	W352	C1(/C=N/N2CCOCC2)=CC=CC=C1	O=C(O1)ON=C1C2=CC(OCCO3)=C3C=C2	O=C(NC1=CC=CC=C1/C=N/N2CCOCC2)C3=CC=C(OCCO4)C4=C3	48
A2	B16	W353	CC1=CC=C(/C=N/N2CCOCC2)C=C1	O=C(O1)ON=C1C2=CC(OCCO3)=C3C=C2	O=C(NC1=CC(C)=CC=C1/C=N/N2CCOCC2)C3=CC=C(OCCO4)C4=C3	57
A3	B16	W354	CC1=CC=CC(/C=N/N2CCOCC2)=C1	O=C(O1)ON=C1C2=CC(OCCO3)=C3C=C2	O=C(NC1=CC=C(C)C=C1/C=N/N2CCOCC2)C3=CC=C(OCCO4)C4=C3	50
A4	B16	W355	CC1=C(/C=N/N2CCOCC2)C=CC=C1	O=C(O1)ON=C1C2=CC(OCCO3)=C3C=C2	O=C(NC1=C(/C=N/N2CCOCC2)C(C)=CC=C1)C3=CC=C(OCCO4)C4=C3	57
A5	B16	W356	CCC1=CC=C(/C=N/N2CCOCC2)C=C1	O=C(O1)ON=C1C2=CC(OCCO3)=C3C=C2	O=C(NC1=CC(CC)=CC=C1/C=N/N2CCOCC2)C3=CC=C(OCCO4)C4=C3	36
A6	B16	W357	CC(C)C1=CC=C(/C=N/N2CCOCC2)C=C1	O=C(O1)ON=C1C2=CC(OCCO3)=C3C=C2	O=C(NC1=CC(C(C)C)=CC=C1/C=N/N2CCOCC2)C3=CC=C(OCCO4)C4=C3	41
A8	B16	W358	COC1=CC=C(/C=N/N2CCOCC2)C=C1	O=C(O1)ON=C1C2=CC(OCCO3)=C3C=C2	O=C(NC1=CC(OC)=CC=C1/C=N/N2CCOCC2)C3=CC=C(OCCO4)C4=C3	29
A9	B16	W359	COC1=C(/C=N/N2CCOCC2)C=CC=C1	O=C(O1)ON=C1C2=CC(OCCO3)=C3C=C2	O=C(NC1=C(/C=N/N2CCOCC2)C(OC)=CC=C1)C3=CC=C(OCCO4)C4=C3	2
A11	B16	W360	FC1=CC=C(/C=N/N2CCOCC2)C=C1	O=C(O1)ON=C1C2=CC(OCCO3)=C3C=C2	O=C(NC1=C(/C=N/N2CCOCC2)C=CC(F)=C1)C3=CC=C(OCCO4)C4=C3	19
A12	B16	W361	FC1=CC(/C=N/N2CCOCC2)=CC=C1	O=C(O1)ON=C1C2=CC(OCCO3)=C3C=C2	O=C(NC1=C(/C=N/N2CCOCC2)C=C(F)C=C1)C3=CC=C(OCCO4)C4=C3	11
A13	B16	W362	FC1=C(/C=N/N2CCOCC2)C=CC=C1	O=C(O1)ON=C1C2=CC(OCCO3)=C3C=C2	O=C(NC1=CC=CC(F)=C1/C=N/N2CCOCC2)C3=CC=C(OCCO4)C4=C3	25
A14	B16	W363	ClC1=CC=C(/C=N/N2CCOCC2)C=C1	O=C(O1)ON=C1C2=CC(OCCO3)=C3C=C2	O=C(NC1=CC(Cl)=CC=C1/C=N/N2CCOCC2)C3=CC=C(OCCO4)C4=C3	30
A15	B16	W364	BrC1=CC=C(/C=N/N2CCOCC2)C=C1	O=C(O1)ON=C1C2=CC(OCCO3)=C3C=C2	O=C(NC1=CC(Br)=CC=C1/C=N/N2CCOCC2)C3=CC=C(OCCO4)C4=C3	19
A16	B16	W365	BrC1=C(/C=N/N2CCOCC2)C=CC=C1	O=C(O1)ON=C1C2=CC(OCCO3)=C3C=C2	O=C(NC1=CC=CC(Br)=C1/C=N/N2CCOCC2)C3=CC=C(OCCO4)C4=C3	24
A17	B16	W366	FC(C1=CC=CC(/C=N/N2CCOCC2)=C1)(F)F	O=C(O1)ON=C1C2=CC(OCCO3)=C3C=C2	O=C(NC1=CC=C(C(F)(F)F)C=C1/C=N/N2CCOCC2)C3=CC=C(OCCO4)C4=C3	28
A19	B16	W367	OC(C=C1)=CC=C1/C=N/N2CCOCC2	O=C(O1)ON=C1C2=CC(OCCO3)=C3C=C2	O=C(NC1=CC(O)=CC=C1/C=N/N2CCOCC2)C3=CC=C(OCCO4)C4=C3	2
A20	B16	W368	OC(C=CC=C1)=C1/C=N/N2CCOCC2	O=C(O1)ON=C1C2=CC(OCCO3)=C3C=C2	O=C(NC1=CC=CC(O)=C1/C=N/N2CCOCC2)C3=CC=C(OCCO4)C4=C3	0
A21	B16	W369	O=C(C1=CC=C(/C=N/N2CCOCC2)C=C1)OC	O=C(O1)ON=C1C2=CC(OCCO3)=C3C=C2	O=C(NC1=CC(C(OC)=O)=CC=C1/C=N/N2CCOCC2)C3=CC=C(OCCO4)C4=C3	21
A22	B16	W370	N#CC1=CC=C(/C=N/N2CCOCC2)C=C1	O=C(O1)ON=C1C2=CC(OCCO3)=C3C=C2	O=C(NC1=CC(C#N)=CC=C1/C=N/N2CCOCC2)C3=CC=C(OCCO4)C4=C3	10
A23	B16	W371	O=S(C1=CC=C(/C=N/N2CCOCC2)C=C1)(C)=O	O=C(O1)ON=C1C2=CC(OCCO3)=C3C=C2	O=C(NC1=CC(S(=O)(C)=O)=CC=C1/C=N/N2CCOCC2)C3=CC=C(OCCO4)C4=C3	17
A24	B16	W372	O=[N+](C1=CC(/C=N/N2CCOCC2)=CC=C1)[O-]	O=C(O1)ON=C1C2=CC(OCCO3)=C3C=C2	O=C(NC1=C(/C=N/N2CCOCC2)C=C(C=C1)[N+]([O-])=O)C3=CC=C(OCCO4)C4=C3	6
A25	B16	W373	O=[N+](C1=CC=CC=C1/C=N/N2CCOCC2)[O-]	O=C(O1)ON=C1C2=CC(OCCO3)=C3C=C2	O=C(NC1=C(/C=N/N2CCOCC2)C([N+]([O-])=O)=CC=C1)C3=CC=C(OCCO4)C4=C3	13
A26	B16	W374	C=CC1=CC=C(/C=N/N2CCOCC2)C=C1	O=C(O1)ON=C1C2=CC(OCCO3)=C3C=C2	O=C(NC1=CC(C=C)=CC=C1/C=N/N2CCOCC2)C3=CC=C(OCCO4)C4=C3	14
A27	B16	W375	CC1=C(/C=N/N2CCOCC2)C=CC=C1C	O=C(O1)ON=C1C2=CC(OCCO3)=C3C=C2	O=C(NC1=CC=C(C)C(C)=C1/C=N/N2CCOCC2)C3=CC=C(OCCO4)C4=C3	47
A28	B16	W376	CC1=CC(C)=CC(/C=N/N2CCOCC2)=C1	O=C(O1)ON=C1C2=CC(OCCO3)=C3C=C2	O=C(NC1=C(/C=N/N2CCOCC2)C=C(C)C=C1C)C3=CC=C(OCCO4)C4=C3	21
A29	B16	W377	C12=CC(/C=N/N3CCOCC3)=CC=C1OCC2	O=C(O1)ON=C1C2=CC(OCCO3)=C3C=C2	O=C(NC1=C(/C=N/N2CCOCC2)C=C(CCO3)C3=C1)C4=CC=C(OCCO5)C5=C4	32
A30	B16	W378	C1(C=CC=C2)=C2C=CC=C1/C=N\N3CCOCC3	O=C(O1)ON=C1C2=CC(OCCO3)=C3C=C2	O=C(NC1=C(/C=N\N2CCOCC2)C(C=CC=C3)=C3C=C1)C4=CC=C(OCCO5)C5=C4	42
A1	B18	W379	C1(/C=N/N2CCOCC2)=CC=CC=C1	O=C1ON=C(/C=C/C2=CC=C(C)C=C2)O1	O=C(NC1=CC=CC=C1/C=N/N2CCOCC2)/C=C/C3=CC=C(C)C=C3	0
A2	B18	W380	CC1=CC=C(/C=N/N2CCOCC2)C=C1	O=C1ON=C(/C=C/C2=CC=C(C)C=C2)O1	O=C(NC1=CC(C)=CC=C1/C=N/N2CCOCC2)/C=C/C3=CC=C(C)C=C3	7
A3	B18	W381	CC1=CC=CC(/C=N/N2CCOCC2)=C1	O=C1ON=C(/C=C/C2=CC=C(C)C=C2)O1	O=C(NC1=CC=C(C)C=C1/C=N/N2CCOCC2)/C=C/C3=CC=C(C)C=C3	7
A4	B18	W382	CC1=C(/C=N/N2CCOCC2)C=CC=C1	O=C1ON=C(/C=C/C2=CC=C(C)C=C2)O1	O=C(NC1=C(/C=N/N2CCOCC2)C(C)=CC=C1)/C=C/C3=CC=C(C)C=C3	6
A5	B18	W383	CCC1=CC=C(/C=N/N2CCOCC2)C=C1	O=C1ON=C(/C=C/C2=CC=C(C)C=C2)O1	O=C(NC1=CC(CC)=CC=C1/C=N/N2CCOCC2)/C=C/C3=CC=C(C)C=C3	0
A6	B18	W384	CC(C)C1=CC=C(/C=N/N2CCOCC2)C=C1	O=C1ON=C(/C=C/C2=CC=C(C)C=C2)O1	O=C(NC1=CC(C(C)C)=CC=C1/C=N/N2CCOCC2)/C=C/C3=CC=C(C)C=C3	9
A8	B18	W385	COC1=CC=C(/C=N/N2CCOCC2)C=C1	O=C1ON=C(/C=C/C2=CC=C(C)C=C2)O1	O=C(NC1=CC(OC)=CC=C1/C=N/N2CCOCC2)/C=C/C3=CC=C(C)C=C3	1
A9	B18	W386	COC1=C(/C=N/N2CCOCC2)C=CC=C1	O=C1ON=C(/C=C/C2=CC=C(C)C=C2)O1	O=C(NC1=C(/C=N/N2CCOCC2)C(OC)=CC=C1)/C=C/C3=CC=C(C)C=C3	0
A11	B18	W387	FC1=CC=C(/C=N/N2CCOCC2)C=C1	O=C1ON=C(/C=C/C2=CC=C(C)C=C2)O1	O=C(NC1=C(/C=N/N2CCOCC2)C=CC(F)=C1)/C=C/C3=CC=C(C)C=C3	1
A12	B18	W388	FC1=CC(/C=N/N2CCOCC2)=CC=C1	O=C1ON=C(/C=C/C2=CC=C(C)C=C2)O1	O=C(NC1=C(/C=N/N2CCOCC2)C=C(F)C=C1)/C=C/C3=CC=C(C)C=C3	0
A13	B18	W389	FC1=C(/C=N/N2CCOCC2)C=CC=C1	O=C1ON=C(/C=C/C2=CC=C(C)C=C2)O1	O=C(NC1=CC=CC(F)=C1/C=N/N2CCOCC2)/C=C/C3=CC=C(C)C=C3	0
A14	B18	W390	ClC1=CC=C(/C=N/N2CCOCC2)C=C1	O=C1ON=C(/C=C/C2=CC=C(C)C=C2)O1	O=C(NC1=CC(Cl)=CC=C1/C=N/N2CCOCC2)/C=C/C3=CC=C(C)C=C3	0
A15	B18	W391	BrC1=CC=C(/C=N/N2CCOCC2)C=C1	O=C1ON=C(/C=C/C2=CC=C(C)C=C2)O1	O=C(NC1=CC(Br)=CC=C1/C=N/N2CCOCC2)/C=C/C3=CC=C(C)C=C3	0
A16	B18	W392	BrC1=C(/C=N/N2CCOCC2)C=CC=C1	O=C1ON=C(/C=C/C2=CC=C(C)C=C2)O1	O=C(NC1=CC=CC(Br)=C1/C=N/N2CCOCC2)/C=C/C3=CC=C(C)C=C3	0
A17	B18	W393	FC(C1=CC=CC(/C=N/N2CCOCC2)=C1)(F)F	O=C1ON=C(/C=C/C2=CC=C(C)C=C2)O1	O=C(NC1=CC=C(C(F)(F)F)C=C1/C=N/N2CCOCC2)/C=C/C3=CC=C(C)C=C3	0
A19	B18	W394	OC(C=C1)=CC=C1/C=N/N2CCOCC2	O=C1ON=C(/C=C/C2=CC=C(C)C=C2)O1	O=C(NC1=CC(O)=CC=C1/C=N/N2CCOCC2)/C=C/C3=CC=C(C)C=C3	0
A20	B18	W395	OC(C=CC=C1)=C1/C=N/N2CCOCC2	O=C1ON=C(/C=C/C2=CC=C(C)C=C2)O1	O=C(NC1=CC=CC(O)=C1/C=N/N2CCOCC2)/C=C/C3=CC=C(C)C=C3	0
A21	B18	W396	O=C(C1=CC=C(/C=N/N2CCOCC2)C=C1)OC	O=C1ON=C(/C=C/C2=CC=C(C)C=C2)O1	O=C(NC1=CC(C(OC)=O)=CC=C1/C=N/N2CCOCC2)/C=C/C3=CC=C(C)C=C3	0
A22	B18	W397	N#CC1=CC=C(/C=N/N2CCOCC2)C=C1	O=C1ON=C(/C=C/C2=CC=C(C)C=C2)O1	O=C(NC1=CC(C#N)=CC=C1/C=N/N2CCOCC2)/C=C/C3=CC=C(C)C=C3	0
A23	B18	W398	O=S(C1=CC=C(/C=N/N2CCOCC2)C=C1)(C)=O	O=C1ON=C(/C=C/C2=CC=C(C)C=C2)O1	O=C(NC1=CC(S(=O)(C)=O)=CC=C1/C=N/N2CCOCC2)/C=C/C3=CC=C(C)C=C3	0
A24	B18	W399	O=[N+](C1=CC(/C=N/N2CCOCC2)=CC=C1)[O-]	O=C1ON=C(/C=C/C2=CC=C(C)C=C2)O1	O=C(NC1=C(/C=N/N2CCOCC2)C=C(C=C1)[N+]([O-])=O)/C=C/C3=CC=C(C)C=C3	0
A25	B18	W400	O=[N+](C1=CC=CC=C1/C=N/N2CCOCC2)[O-]	O=C1ON=C(/C=C/C2=CC=C(C)C=C2)O1	O=C(NC1=C(/C=N/N2CCOCC2)C([N+]([O-])=O)=CC=C1)/C=C/C3=CC=C(C)C=C3	0
A26	B18	W401	C=CC1=CC=C(/C=N/N2CCOCC2)C=C1	O=C1ON=C(/C=C/C2=CC=C(C)C=C2)O1	O=C(NC1=CC(C=C)=CC=C1/C=N/N2CCOCC2)/C=C/C3=CC=C(C)C=C3	0
A27	B18	W402	CC1=C(/C=N/N2CCOCC2)C=CC=C1C	O=C1ON=C(/C=C/C2=CC=C(C)C=C2)O1	O=C(NC1=CC=C(C)C(C)=C1/C=N/N2CCOCC2)/C=C/C3=CC=C(C)C=C3	0
A28	B18	W403	CC1=CC(C)=CC(/C=N/N2CCOCC2)=C1	O=C1ON=C(/C=C/C2=CC=C(C)C=C2)O1	O=C(NC1=C(/C=N/N2CCOCC2)C=C(C)C=C1C)/C=C/C3=CC=C(C)C=C3	0
A29	B18	W404	C12=CC(/C=N/N3CCOCC3)=CC=C1OCC2	O=C1ON=C(/C=C/C2=CC=C(C)C=C2)O1	O=C(NC1=C(/C=N/N2CCOCC2)C=C(CCO3)C3=C1)/C=C/C4=CC=C(C)C=C4	0
A30	B18	W405	C1(C=CC=C2)=C2C=CC=C1/C=N\N3CCOCC3	O=C1ON=C(/C=C/C2=CC=C(C)C=C2)O1	O=C(NC1=C(/C=N\N2CCOCC2)C(C=CC=C3)=C3C=C1)/C=C/C4=CC=C(C)C=C4	0
A1	B20	W406	C1(/C=N/N2CCOCC2)=CC=CC=C1	O=C1ON=C(CCC2=CC=C(C)C=C2)O1	CC(C=C1)=CC=C1CCC(NC(C=CC=C2)=C2/C=N/N3CCOCC3)=O	1
A2	B20	W407	CC1=CC=C(/C=N/N2CCOCC2)C=C1	O=C1ON=C(CCC2=CC=C(C)C=C2)O1	CC1=CC(NC(CCC2=CC=C(C=C2)C)=O)=C(C=C1)/C=N/N3CCOCC3	0
A3	B20	W408	CC1=CC=CC(/C=N/N2CCOCC2)=C1	O=C1ON=C(CCC2=CC=C(C)C=C2)O1	CC1=CC=C(NC(CCC2=CC=C(C=C2)C)=O)C(/C=N/N3CCOCC3)=C1	0
A4	B20	W409	CC1=C(/C=N/N2CCOCC2)C=CC=C1	O=C1ON=C(CCC2=CC=C(C)C=C2)O1	CC1=C(C(NC(CCC2=CC=C(C=C2)C)=O)=CC=C1)/C=N/N3CCOCC3	0
A5	B20	W410	CCC1=CC=C(/C=N/N2CCOCC2)C=C1	O=C1ON=C(CCC2=CC=C(C)C=C2)O1	CCC1=CC(NC(CCC2=CC=C(C=C2)C)=O)=C(C=C1)/C=N/N3CCOCC3	0
A6	B20	W411	CC(C)C1=CC=C(/C=N/N2CCOCC2)C=C1	O=C1ON=C(CCC2=CC=C(C)C=C2)O1	CC(C1=CC(NC(CCC2=CC=C(C=C2)C)=O)=C(C=C1)/C=N/N3CCOCC3)C	6
A8	B20	W412	COC1=CC=C(/C=N/N2CCOCC2)C=C1	O=C1ON=C(CCC2=CC=C(C)C=C2)O1	COC1=CC(NC(CCC2=CC=C(C=C2)C)=O)=C(C=C1)/C=N/N3CCOCC3	0
A9	B20	W413	COC1=C(/C=N/N2CCOCC2)C=CC=C1	O=C1ON=C(CCC2=CC=C(C)C=C2)O1	COC1=C(C(NC(CCC2=CC=C(C=C2)C)=O)=CC=C1)/C=N/N3CCOCC3	0
A11	B20	W414	FC1=CC=C(/C=N/N2CCOCC2)C=C1	O=C1ON=C(CCC2=CC=C(C)C=C2)O1	FC1=CC(NC(CCC2=CC=C(C=C2)C)=O)=C(C=C1)/C=N/N3CCOCC3	0
A12	B20	W415	FC1=CC(/C=N/N2CCOCC2)=CC=C1	O=C1ON=C(CCC2=CC=C(C)C=C2)O1	FC1=CC(/C=N/N2CCOCC2)=C(NC(CCC3=CC=C(C=C3)C)=O)C=C1	0
A13	B20	W416	FC1=C(/C=N/N2CCOCC2)C=CC=C1	O=C1ON=C(CCC2=CC=C(C)C=C2)O1	FC1=C(C(NC(CCC2=CC=C(C=C2)C)=O)=CC=C1)/C=N/N3CCOCC3	0
A14	B20	W417	ClC1=CC=C(/C=N/N2CCOCC2)C=C1	O=C1ON=C(CCC2=CC=C(C)C=C2)O1	ClC1=CC(NC(CCC2=CC=C(C=C2)C)=O)=C(C=C1)/C=N/N3CCOCC3	0
A15	B20	W418	BrC1=CC=C(/C=N/N2CCOCC2)C=C1	O=C1ON=C(CCC2=CC=C(C)C=C2)O1	BrC1=CC(NC(CCC2=CC=C(C=C2)C)=O)=C(C=C1)/C=N/N3CCOCC3	0
A16	B20	W419	BrC1=C(/C=N/N2CCOCC2)C=CC=C1	O=C1ON=C(CCC2=CC=C(C)C=C2)O1	BrC1=C(C(NC(CCC2=CC=C(C=C2)C)=O)=CC=C1)/C=N/N3CCOCC3	1
A17	B20	W420	FC(C1=CC=CC(/C=N/N2CCOCC2)=C1)(F)F	O=C1ON=C(CCC2=CC=C(C)C=C2)O1	FC(F)(F)C1=CC=C(NC(CCC2=CC=C(C=C2)C)=O)C(/C=N/N3CCOCC3)=C1	0
A19	B20	W421	OC(C=C1)=CC=C1/C=N/N2CCOCC2	O=C1ON=C(CCC2=CC=C(C)C=C2)O1	OC1=CC=C(/C=N/N2CCOCC2)C(NC(CCC3=CC=C(C=C3)C)=O)=C1	0
A20	B20	W422	OC(C=CC=C1)=C1/C=N/N2CCOCC2	O=C1ON=C(CCC2=CC=C(C)C=C2)O1	OC1=C(/C=N/N2CCOCC2)C(NC(CCC3=CC=C(C=C3)C)=O)=CC=C1	0
A21	B20	W423	O=C(C1=CC=C(/C=N/N2CCOCC2)C=C1)OC	O=C1ON=C(CCC2=CC=C(C)C=C2)O1	O=C(OC)C1=CC(NC(CCC2=CC=C(C=C2)C)=O)=C(C=C1)/C=N/N3CCOCC3	1
A22	B20	W424	N#CC1=CC=C(/C=N/N2CCOCC2)C=C1	O=C1ON=C(CCC2=CC=C(C)C=C2)O1	N#CC1=CC(NC(CCC2=CC=C(C=C2)C)=O)=C(C=C1)/C=N/N3CCOCC3	0
A23	B20	W425	O=S(C1=CC=C(/C=N/N2CCOCC2)C=C1)(C)=O	O=C1ON=C(CCC2=CC=C(C)C=C2)O1	O=S(C1=CC(NC(CCC2=CC=C(C=C2)C)=O)=C(C=C1)/C=N/N3CCOCC3)(C)=O	0
A24	B20	W426	O=[N+](C1=CC(/C=N/N2CCOCC2)=CC=C1)[O-]	O=C1ON=C(CCC2=CC=C(C)C=C2)O1	O=[N+]([O-])C1=CC(/C=N/N2CCOCC2)=C(NC(CCC3=CC=C(C=C3)C)=O)C=C1	0
A25	B20	W427	O=[N+](C1=CC=CC=C1/C=N/N2CCOCC2)[O-]	O=C1ON=C(CCC2=CC=C(C)C=C2)O1	O=[N+]([O-])C1=CC=CC(NC(CCC2=CC=C(C=C2)C)=O)=C1/C=N/N3CCOCC3	0
A26	B20	W428	C=CC1=CC=C(/C=N/N2CCOCC2)C=C1	O=C1ON=C(CCC2=CC=C(C)C=C2)O1	C=CC1=CC(NC(CCC2=CC=C(C=C2)C)=O)=C(C=C1)/C=N/N3CCOCC3	0
A27	B20	W429	CC1=C(/C=N/N2CCOCC2)C=CC=C1C	O=C1ON=C(CCC2=CC=C(C)C=C2)O1	CC1=C(C(NC(CCC2=CC=C(C=C2)C)=O)=CC=C1C)/C=N/N3CCOCC3	0
A28	B20	W430	CC1=CC(C)=CC(/C=N/N2CCOCC2)=C1	O=C1ON=C(CCC2=CC=C(C)C=C2)O1	CC1=CC(C)=C(NC(CCC2=CC=C(C=C2)C)=O)C(/C=N/N3CCOCC3)=C1	0
A29	B20	W431	C12=CC(/C=N/N3CCOCC3)=CC=C1OCC2	O=C1ON=C(CCC2=CC=C(C)C=C2)O1	CC(C=C1)=CC=C1CCC(NC2=C(/C=N/N3CCOCC3)C=C4C(OCC4)=C2)=O	0
A30	B20	W432	C1(C=CC=C2)=C2C=CC=C1/C=N\N3CCOCC3	O=C1ON=C(CCC2=CC=C(C)C=C2)O1	CC(C=C1)=CC=C1CCC(NC2=C(/C=N\N3CCOCC3)C4=C(C=C2)C=CC=C4)=O	0
A7	B1	W433	CC(C1=CC=C(/C=N/N2CCOCC2)C=C1)(C)C	O=C(O1)ON=C1C2=CC=C(C)C=C2	O=C(NC1=CC(C(C)(C)C)=CC=C1/C=N/N2CCOCC2)C3=CC=C(C)C=C3	20
A10	B1	W434	CCOC1=C(/C=N/N2CCOCC2)C=CC=C1	O=C(O1)ON=C1C2=CC=C(C)C=C2	O=C(NC1=CC=CC(OCC)=C1/C=N/N2CCOCC2)C3=CC=C(C)C=C3	14
A18	B1	W435	CN(C)C1=CC=C(/C=N/N2CCOCC2)C=C1	O=C(O1)ON=C1C2=CC=C(C)C=C2	CN(C)C1=CC=C(/C=N/N2CCOCC2)C(NC(C3=CC=C(C)C=C3)=O)=C1	13
A7	B2	W436	CC(C1=CC=C(/C=N/N2CCOCC2)C=C1)(C)C	O=C(O1)ON=C1C2=CC(C)=CC=C2	O=C(NC1=CC(C(C)(C)C)=CC=C1/C=N/N2CCOCC2)C3=CC=CC(C)=C3	45
A10	B2	W437	CCOC1=C(/C=N/N2CCOCC2)C=CC=C1	O=C(O1)ON=C1C2=CC(C)=CC=C2	O=C(NC1=CC=CC(OCC)=C1/C=N/N2CCOCC2)C3=CC=CC(C)=C3	23
A18	B2	W438	CN(C)C1=CC=C(/C=N/N2CCOCC2)C=C1	O=C(O1)ON=C1C2=CC(C)=CC=C2	CN(C)C1=CC=C(/C=N/N2CCOCC2)C(NC(C3=CC=CC(C)=C3)=O)=C1	42
A7	B3	W439	CC(C1=CC=C(/C=N/N2CCOCC2)C=C1)(C)C	O=C(O1)ON=C1C2=C(C)C=CC=C2	O=C(NC1=CC(C(C)(C)C)=CC=C1/C=N/N2CCOCC2)C3=CC=CC=C3C	12
A10	B3	W440	CCOC1=C(/C=N/N2CCOCC2)C=CC=C1	O=C(O1)ON=C1C2=C(C)C=CC=C2	O=C(NC1=CC=CC(OCC)=C1/C=N/N2CCOCC2)C3=CC=CC=C3C	4
A18	B3	W441	CN(C)C1=CC=C(/C=N/N2CCOCC2)C=C1	O=C(O1)ON=C1C2=C(C)C=CC=C2	CN(C)C1=CC=C(/C=N/N2CCOCC2)C(NC(C3=CC=CC=C3C)=O)=C1	15
A7	B4	W442	CC(C1=CC=C(/C=N/N2CCOCC2)C=C1)(C)C	O=C(O1)ON=C1C2=CC=C(OC)C=C2	O=C(NC1=CC(C(C)(C)C)=CC=C1/C=N/N2CCOCC2)C3=CC=C(OC)C=C3	15
A10	B4	W443	CCOC1=C(/C=N/N2CCOCC2)C=CC=C1	O=C(O1)ON=C1C2=CC=C(OC)C=C2	O=C(NC1=CC=CC(OCC)=C1/C=N/N2CCOCC2)C3=CC=C(OC)C=C3	5
A18	B4	W444	CN(C)C1=CC=C(/C=N/N2CCOCC2)C=C1	O=C(O1)ON=C1C2=CC=C(OC)C=C2	O=C(NC1=CC(N(C)C)=CC=C1/C=N/N2CCOCC2)C3=CC=C(OC)C=C3	12
A1	B5	W445	C1(/C=N/N2CCOCC2)=CC=CC=C1	O=C(O1)ON=C1C2=CC=C(C(C)(C)C)C=C2	O=C(NC1=CC=CC=C1/C=N/N2CCOCC2)C3=CC=C(C(C)(C)C)C=C3	7
A2	B5	W446	CC1=CC=C(/C=N/N2CCOCC2)C=C1	O=C(O1)ON=C1C2=CC=C(C(C)(C)C)C=C2	O=C(NC1=CC(C)=CC=C1/C=N/N2CCOCC2)C3=CC=C(C(C)(C)C)C=C3	11
A3	B5	W447	CC1=CC=CC(/C=N/N2CCOCC2)=C1	O=C(O1)ON=C1C2=CC=C(C(C)(C)C)C=C2	O=C(NC1=CC=C(C)C=C1/C=N/N2CCOCC2)C3=CC=C(C(C)(C)C)C=C3	10
A4	B5	W448	CC1=C(/C=N/N2CCOCC2)C=CC=C1	O=C(O1)ON=C1C2=CC=C(C(C)(C)C)C=C2	O=C(NC1=C(/C=N/N2CCOCC2)C(C)=CC=C1)C3=CC=C(C(C)(C)C)C=C3	18
A5	B5	W449	CCC1=CC=C(/C=N/N2CCOCC2)C=C1	O=C(O1)ON=C1C2=CC=C(C(C)(C)C)C=C2	O=C(NC1=CC(CC)=CC=C1/C=N/N2CCOCC2)C3=CC=C(C(C)(C)C)C=C3	17
A6	B5	W450	CC(C)C1=CC=C(/C=N/N2CCOCC2)C=C1	O=C(O1)ON=C1C2=CC=C(C(C)(C)C)C=C2	O=C(NC1=CC(C(C)C)=CC=C1/C=N/N2CCOCC2)C3=CC=C(C(C)(C)C)C=C3	12
A7	B5	W451	CC(C1=CC=C(/C=N/N2CCOCC2)C=C1)(C)C	O=C(O1)ON=C1C2=CC=C(C(C)(C)C)C=C2	O=C(NC1=CC(C(C)(C)C)=CC=C1/C=N/N2CCOCC2)C3=CC=C(C(C)(C)C)C=C3	12
A8	B5	W452	COC1=CC=C(/C=N/N2CCOCC2)C=C1	O=C(O1)ON=C1C2=CC=C(C(C)(C)C)C=C2	O=C(NC1=CC(C(C)(C)C)=CC=C1/C=N/N2CCOCC2)C3=CC=C(C(C)(C)C)C=C3	2
A9	B5	W453	COC1=C(/C=N/N2CCOCC2)C=CC=C1	O=C(O1)ON=C1C2=CC=C(C(C)(C)C)C=C2	O=C(NC1=C(/C=N/N2CCOCC2)C(OC)=CC=C1)C3=CC=C(C(C)(C)C)C=C3	7
A10	B5	W454	CCOC1=C(/C=N/N2CCOCC2)C=CC=C1	O=C(O1)ON=C1C2=CC=C(C(C)(C)C)C=C2	O=C(NC1=CC=CC(OCC)=C1/C=N/N2CCOCC2)C3=CC=C(C(C)(C)C)C=C3	10
A11	B5	W455	FC1=CC=C(/C=N/N2CCOCC2)C=C1	O=C(O1)ON=C1C2=CC=C(C(C)(C)C)C=C2	O=C(NC1=C(/C=N/N2CCOCC2)C=CC(F)=C1)C3=CC=C(C(C)(C)C)C=C3	9
A12	B5	W456	FC1=CC(/C=N/N2CCOCC2)=CC=C1	O=C(O1)ON=C1C2=CC=C(C(C)(C)C)C=C2	O=C(NC1=C(/C=N/N2CCOCC2)C=C(F)C=C1)C3=CC=C(C(C)(C)C)C=C3	6
A13	B5	W457	FC1=C(/C=N/N2CCOCC2)C=CC=C1	O=C(O1)ON=C1C2=CC=C(C(C)(C)C)C=C2	O=C(NC1=CC=CC(F)=C1/C=N/N2CCOCC2)C3=CC=C(C(C)(C)C)C=C3	12
A14	B5	W458	ClC1=CC=C(/C=N/N2CCOCC2)C=C1	O=C(O1)ON=C1C2=CC=C(C(C)(C)C)C=C2	O=C(NC1=CC(Cl)=CC=C1/C=N/N2CCOCC2)C3=CC=C(C(C)(C)C)C=C3	6
A15	B5	W459	BrC1=CC=C(/C=N/N2CCOCC2)C=C1	O=C(O1)ON=C1C2=CC=C(C(C)(C)C)C=C2	O=C(NC1=CC(Br)=CC=C1/C=N/N2CCOCC2)C3=CC=C(C(C)(C)C)C=C3	7
A16	B5	W460	BrC1=C(/C=N/N2CCOCC2)C=CC=C1	O=C(O1)ON=C1C2=CC=C(C(C)(C)C)C=C2	O=C(NC1=CC=CC(Br)=C1/C=N/N2CCOCC2)C3=CC=C(C(C)(C)C)C=C3	8
A17	B5	W461	FC(C1=CC=CC(/C=N/N2CCOCC2)=C1)(F)F	O=C(O1)ON=C1C2=CC=C(C(C)(C)C)C=C2	O=C(NC1=CC=C(C(F)(F)F)C=C1/C=N/N2CCOCC2)C3=CC=C(C(C)(C)C)C=C3	16
A18	B5	W462	CN(C)C1=CC=C(/C=N/N2CCOCC2)C=C1	O=C(O1)ON=C1C2=CC=C(C(C)(C)C)C=C2	O=C(NC1=CC(N(C)C)=CC=C1/C=N/N2CCOCC2)C3=CC=C(C(C)(C)C)C=C3	6
A19	B5	W463	OC(C=C1)=CC=C1/C=N/N2CCOCC2	O=C(O1)ON=C1C2=CC=C(C(C)(C)C)C=C2	O=C(NC1=CC(O)=CC=C1/C=N/N2CCOCC2)C3=CC=C(C(C)(C)C)C=C3	14
A20	B5	W464	OC(C=CC=C1)=C1/C=N/N2CCOCC2	O=C(O1)ON=C1C2=CC=C(C(C)(C)C)C=C2	O=C(NC1=CC=CC(O)=C1/C=N/N2CCOCC2)C3=CC=C(C(C)(C)C)C=C3	6
A21	B5	W465	O=C(C1=CC=C(/C=N/N2CCOCC2)C=C1)OC	O=C(O1)ON=C1C2=CC=C(C(C)(C)C)C=C2	O=C(NC1=CC(C(OC)=O)=CC=C1/C=N/N2CCOCC2)C3=CC=C(C(C)(C)C)C=C3	22
A22	B5	W466	N#CC1=CC=C(/C=N/N2CCOCC2)C=C1	O=C(O1)ON=C1C2=CC=C(C(C)(C)C)C=C2	O=C(NC1=CC(C#N)=CC=C1/C=N/N2CCOCC2)C3=CC=C(C(C)(C)C)C=C3	9
A23	B5	W467	O=S(C1=CC=C(/C=N/N2CCOCC2)C=C1)(C)=O	O=C(O1)ON=C1C2=CC=C(C(C)(C)C)C=C2	O=C(NC1=CC(S(=O)(C)=O)=CC=C1/C=N/N2CCOCC2)C3=CC=C(C(C)(C)C)C=C3	16
A24	B5	W468	O=[N+](C1=CC(/C=N/N2CCOCC2)=CC=C1)[O-]	O=C(O1)ON=C1C2=CC=C(C(C)(C)C)C=C2	O=C(NC1=C(/C=N/N2CCOCC2)C=C(C=C1)[N+]([O-])=O)C3=CC=C(C(C)(C)C)C=C3	4
A25	B5	W469	O=[N+](C1=CC=CC=C1/C=N/N2CCOCC2)[O-]	O=C(O1)ON=C1C2=CC=C(C(C)(C)C)C=C2	O=C(NC1=C(/C=N/N2CCOCC2)C([N+]([O-])=O)=CC=C1)C3=CC=C(C(C)(C)C)C=C3	6
A26	B5	W470	C=CC1=CC=C(/C=N/N2CCOCC2)C=C1	O=C(O1)ON=C1C2=CC=C(C(C)(C)C)C=C2	O=C(NC1=CC(C=C)=CC=C1/C=N/N2CCOCC2)C3=CC=C(C(C)(C)C)C=C3	4
A27	B5	W471	CC1=C(/C=N/N2CCOCC2)C=CC=C1C	O=C(O1)ON=C1C2=CC=C(C(C)(C)C)C=C2	O=C(NC1=CC=C(C)C(C)=C1/C=N/N2CCOCC2)C3=CC=C(C(C)(C)C)C=C3	14
A28	B5	W472	CC1=CC(C)=CC(/C=N/N2CCOCC2)=C1	O=C(O1)ON=C1C2=CC=C(C(C)(C)C)C=C2	O=C(NC1=C(/C=N/N2CCOCC2)C=C(C)C=C1C)C3=CC=C(C(C)(C)C)C=C3	12
A29	B5	W473	C12=CC(/C=N/N3CCOCC3)=CC=C1OCC2	O=C(O1)ON=C1C2=CC=C(C(C)(C)C)C=C2	O=C(NC1=C(/C=N/N2CCOCC2)C=C(CCO3)C3=C1)C4=CC=C(C(C)(C)C)C=C4	12
A30	B5	W474	C1(C=CC=C2)=C2C=CC=C1/C=N\N3CCOCC3	O=C(O1)ON=C1C2=CC=C(C(C)(C)C)C=C2	O=C(NC1=C(/C=N\N2CCOCC2)C(C=CC=C3)=C3C=C1)C4=CC=C(C(C)(C)C)C=C4	22
A7	B6	W475	CC(C1=CC=C(/C=N/N2CCOCC2)C=C1)(C)C	O=C(O1)ON=C1C2=CC=C(F)C=C2	O=C(NC1=CC(C(C)(C)C)=CC=C1/C=N/N2CCOCC2)C3=CC=C(F)C=C3	42
A10	B6	W476	CCOC1=C(/C=N/N2CCOCC2)C=CC=C1	O=C(O1)ON=C1C2=CC=C(F)C=C2	O=C(NC1=CC=CC(OCC)=C1/C=N/N2CCOCC2)C3=CC=C(F)C=C3	16
A18	B6	W477	CN(C)C1=CC=C(/C=N/N2CCOCC2)C=C1	O=C(O1)ON=C1C2=CC=C(F)C=C2	O=C(NC1=CC(N(C)C)=CC=C1/C=N/N2CCOCC2)C3=CC=C(F)C=C3	50
A7	B7	W478	CC(C1=CC=C(/C=N/N2CCOCC2)C=C1)(C)C	O=C(O1)ON=C1C2=CC=C(Cl)C=C2	O=C(NC1=CC(C(C)(C)C)=CC=C1/C=N/N2CCOCC2)C3=CC=C(Cl)C=C3	57
A10	B7	W479	CCOC1=C(/C=N/N2CCOCC2)C=CC=C1	O=C(O1)ON=C1C2=CC=C(Cl)C=C2	O=C(NC1=CC=CC(OCC)=C1/C=N/N2CCOCC2)C3=CC=C(Cl)C=C3	13
A18	B7	W480	CN(C)C1=CC=C(/C=N/N2CCOCC2)C=C1	O=C(O1)ON=C1C2=CC=C(Cl)C=C2	O=C(NC1=CC(N(C)C)=CC=C1/C=N/N2CCOCC2)C3=CC=C(Cl)C=C3	43
A1	B8	W481	C1(/C=N/N2CCOCC2)=CC=CC=C1	O=C(O1)ON=C1C2=CC=C(Br)C=C2	O=C(NC1=CC=CC=C1/C=N/N2CCOCC2)C3=CC=C(Br)C=C3	54
A2	B8	W482	CC1=CC=C(/C=N/N2CCOCC2)C=C1	O=C(O1)ON=C1C2=CC=C(Br)C=C2	O=C(NC1=CC(C)=CC=C1/C=N/N2CCOCC2)C3=CC=C(Br)C=C3	60
A3	B8	W483	CC1=CC=CC(/C=N/N2CCOCC2)=C1	O=C(O1)ON=C1C2=CC=C(Br)C=C2	O=C(NC1=CC=C(C)C=C1/C=N/N2CCOCC2)C3=CC=C(Br)C=C3	48
A4	B8	W484	CC1=C(/C=N/N2CCOCC2)C=CC=C1	O=C(O1)ON=C1C2=CC=C(Br)C=C2	O=C(NC1=C(/C=N/N2CCOCC2)C(C)=CC=C1)C3=CC=C(Br)C=C3	77
A5	B8	W485	CCC1=CC=C(/C=N/N2CCOCC2)C=C1	O=C(O1)ON=C1C2=CC=C(Br)C=C2	O=C(NC1=CC(CC)=CC=C1/C=N/N2CCOCC2)C3=CC=C(Br)C=C3	40
A6	B8	W486	CC(C)C1=CC=C(/C=N/N2CCOCC2)C=C1	O=C(O1)ON=C1C2=CC=C(Br)C=C2	O=C(NC1=CC(C(C)C)=CC=C1/C=N/N2CCOCC2)C3=CC=C(Br)C=C3	56
A7	B8	W487	CC(C1=CC=C(/C=N/N2CCOCC2)C=C1)(C)C	O=C(O1)ON=C1C2=CC=C(Br)C=C2	O=C(NC1=CC(C(C)(C)C)=CC=C1/C=N/N2CCOCC2)C3=CC=C(Br)C=C3	37
A8	B8	W488	COC1=CC=C(/C=N/N2CCOCC2)C=C1	O=C(O1)ON=C1C2=CC=C(Br)C=C2	O=C(NC1=CC(OC)=CC=C1/C=N/N2CCOCC2)C3=CC=C(Br)C=C3	65
A9	B8	W489	COC1=C(/C=N/N2CCOCC2)C=CC=C1	O=C(O1)ON=C1C2=CC=C(Br)C=C2	O=C(NC1=C(/C=N/N2CCOCC2)C(OC)=CC=C1)C3=CC=C(Br)C=C3	9
A10	B8	W490	CCOC1=C(/C=N/N2CCOCC2)C=CC=C1	O=C(O1)ON=C1C2=CC=C(Br)C=C2	O=C(NC1=CC=CC(OCC)=C1/C=N/N2CCOCC2)C3=CC=C(Br)C=C3	17
A11	B8	W491	FC1=CC=C(/C=N/N2CCOCC2)C=C1	O=C(O1)ON=C1C2=CC=C(Br)C=C2	O=C(NC1=C(/C=N/N2CCOCC2)C=CC(F)=C1)C3=CC=C(Br)C=C3	40
A12	B8	W492	FC1=CC(/C=N/N2CCOCC2)=CC=C1	O=C(O1)ON=C1C2=CC=C(Br)C=C2	O=C(NC1=C(/C=N/N2CCOCC2)C=C(F)C=C1)C3=CC=C(Br)C=C3	42
A13	B8	W493	FC1=C(/C=N/N2CCOCC2)C=CC=C1	O=C(O1)ON=C1C2=CC=C(Br)C=C2	O=C(NC1=CC=CC(F)=C1/C=N/N2CCOCC2)C3=CC=C(Br)C=C3	57
A14	B8	W494	ClC1=CC=C(/C=N/N2CCOCC2)C=C1	O=C(O1)ON=C1C2=CC=C(Br)C=C2	O=C(NC1=CC(Cl)=CC=C1/C=N/N2CCOCC2)C3=CC=C(Br)C=C3	44
A15	B8	W495	BrC1=CC=C(/C=N/N2CCOCC2)C=C1	O=C(O1)ON=C1C2=CC=C(Br)C=C2	O=C(NC1=CC(Br)=CC=C1/C=N/N2CCOCC2)C3=CC=C(Br)C=C3	63
A16	B8	W496	BrC1=C(/C=N/N2CCOCC2)C=CC=C1	O=C(O1)ON=C1C2=CC=C(Br)C=C2	O=C(NC1=CC=CC(Br)=C1/C=N/N2CCOCC2)C3=CC=C(Br)C=C3	65
A17	B8	W497	FC(C1=CC=CC(/C=N/N2CCOCC2)=C1)(F)F	O=C(O1)ON=C1C2=CC=C(Br)C=C2	O=C(NC1=CC=C(C(F)(F)F)C=C1/C=N/N2CCOCC2)C3=CC=C(Br)C=C3	57
A18	B8	W498	CN(C)C1=CC=C(/C=N/N2CCOCC2)C=C1	O=C(O1)ON=C1C2=CC=C(Br)C=C2	O=C(NC1=CC(N(C)C)=CC=C1/C=N/N2CCOCC2)C3=CC=C(Br)C=C3	43
A19	B8	W499	OC(C=C1)=CC=C1/C=N/N2CCOCC2	O=C(O1)ON=C1C2=CC=C(Br)C=C2	O=C(NC1=CC(O)=CC=C1/C=N/N2CCOCC2)C3=CC=C(Br)C=C3	11
A20	B8	W500	OC(C=CC=C1)=C1/C=N/N2CCOCC2	O=C(O1)ON=C1C2=CC=C(Br)C=C2	O=C(NC1=CC=CC(O)=C1/C=N/N2CCOCC2)C3=CC=C(Br)C=C3	13
A21	B8	W501	O=C(C1=CC=C(/C=N/N2CCOCC2)C=C1)OC	O=C(O1)ON=C1C2=CC=C(Br)C=C2	O=C(NC1=CC(C(OC)=O)=CC=C1/C=N/N2CCOCC2)C3=CC=C(Br)C=C3	36
A22	B8	W502	N#CC1=CC=C(/C=N/N2CCOCC2)C=C1	O=C(O1)ON=C1C2=CC=C(Br)C=C2	O=C(NC1=CC(C#N)=CC=C1/C=N/N2CCOCC2)C3=CC=C(Br)C=C3	16
A23	B8	W503	O=S(C1=CC=C(/C=N/N2CCOCC2)C=C1)(C)=O	O=C(O1)ON=C1C2=CC=C(Br)C=C2	O=C(NC1=CC(S(=O)(C)=O)=CC=C1/C=N/N2CCOCC2)C3=CC=C(Br)C=C3	42
A24	B8	W504	O=[N+](C1=CC(/C=N/N2CCOCC2)=CC=C1)[O-]	O=C(O1)ON=C1C2=CC=C(Br)C=C2	O=C(NC1=C(/C=N/N2CCOCC2)C=C(C=C1)[N+]([O-])=O)C3=CC=C(Br)C=C3	10
A25	B8	W505	O=[N+](C1=CC=CC=C1/C=N/N2CCOCC2)[O-]	O=C(O1)ON=C1C2=CC=C(Br)C=C2	O=C(NC1=C(/C=N/N2CCOCC2)C([N+]([O-])=O)=CC=C1)C3=CC=C(Br)C=C3	69
A26	B8	W506	C=CC1=CC=C(/C=N/N2CCOCC2)C=C1	O=C(O1)ON=C1C2=CC=C(Br)C=C2	O=C(NC1=CC(C=C)=CC=C1/C=N/N2CCOCC2)C3=CC=C(Br)C=C3	21
A27	B8	W507	CC1=C(/C=N/N2CCOCC2)C=CC=C1C	O=C(O1)ON=C1C2=CC=C(Br)C=C2	O=C(NC1=CC=C(C)C(C)=C1/C=N/N2CCOCC2)C3=CC=C(Br)C=C3	50
A28	B8	W508	CC1=CC(C)=CC(/C=N/N2CCOCC2)=C1	O=C(O1)ON=C1C2=CC=C(Br)C=C2	O=C(NC1=C(/C=N/N2CCOCC2)C=C(C)C=C1C)C3=CC=C(Br)C=C3	21
A29	B8	W509	C12=CC(/C=N/N3CCOCC3)=CC=C1OCC2	O=C(O1)ON=C1C2=CC=C(Br)C=C2	O=C(NC1=C(/C=N/N2CCOCC2)C=C(CCO3)C3=C1)C4=CC=C(Br)C=C4	22
A30	B8	W510	C1(C=CC=C2)=C2C=CC=C1/C=N\N3CCOCC3	O=C(O1)ON=C1C2=CC=C(Br)C=C2	O=C(NC1=C(/C=N\N2CCOCC2)C(C=CC=C3)=C3C=C1)C4=CC=C(Br)C=C4	40
A7	B9	W511	CC(C1=CC=C(/C=N/N2CCOCC2)C=C1)(C)C	O=C(O1)ON=C1C2=CC=C(I)C=C2	O=C(NC1=CC(C(C)(C)C)=CC=C1/C=N/N2CCOCC2)C3=CC=C(I)C=C3	52
A10	B9	W512	CCOC1=C(/C=N/N2CCOCC2)C=CC=C1	O=C(O1)ON=C1C2=CC=C(I)C=C2	O=C(NC1=CC=CC(OCC)=C1/C=N/N2CCOCC2)C3=CC=C(I)C=C3	15
A18	B9	W513	CN(C)C1=CC=C(/C=N/N2CCOCC2)C=C1	O=C(O1)ON=C1C2=CC=C(I)C=C2	O=C(NC1=CC(N(C)C)=CC=C1/C=N/N2CCOCC2)C3=CC=C(I)C=C3	44
A7	B10	W514	CC(C1=CC=C(/C=N/N2CCOCC2)C=C1)(C)C	O=C(O1)ON=C1C2=CC=C(C(F)(F)F)C=C2	O=C(NC1=CC(C(C)(C)C)=CC=C1/C=N/N2CCOCC2)C3=CC=C(C(F)(F)F)C=C3	52
A10	B10	W515	CCOC1=C(/C=N/N2CCOCC2)C=CC=C1	O=C(O1)ON=C1C2=CC=C(C(F)(F)F)C=C2	O=C(NC1=CC=CC(OCC)=C1/C=N/N2CCOCC2)C3=CC=C(C(F)(F)F)C=C3	9
A18	B10	W516	CN(C)C1=CC=C(/C=N/N2CCOCC2)C=C1	O=C(O1)ON=C1C2=CC=C(C(F)(F)F)C=C2	O=C(NC1=CC(N(C)C)=CC=C1/C=N/N2CCOCC2)C3=CC=C(C(F)(F)F)C=C3	56
A7	B11	W517	CC(C1=CC=C(/C=N/N2CCOCC2)C=C1)(C)C	O=C(O1)ON=C1C2=CC=C(C(OC)=O)C=C2	O=C(NC1=CC(C(C)(C)C)=CC=C1/C=N/N2CCOCC2)C3=CC=C(C(OC)=O)C=C3	5
A10	B11	W518	CCOC1=C(/C=N/N2CCOCC2)C=CC=C1	O=C(O1)ON=C1C2=CC=C(C(OC)=O)C=C2	O=C(NC1=CC=CC(OCC)=C1/C=N/N2CCOCC2)C3=CC=C(C(OC)=O)C=C3	6
A18	B11	W519	CN(C)C1=CC=C(/C=N/N2CCOCC2)C=C1	O=C(O1)ON=C1C2=CC=C(C(OC)=O)C=C2	O=C(NC1=CC(N(C)C)=CC=C1/C=N/N2CCOCC2)C3=CC=C(C(OC)=O)C=C3	7
A7	B12	W520	CC(C1=CC=C(/C=N/N2CCOCC2)C=C1)(C)C	O=C(O1)ON=C1C2=CC=C(N(C)C)C=C2	O=C(NC1=CC(C(C)(C)C)=CC=C1/C=N/N2CCOCC2)C3=CC=C(N(C)C)C=C3	3
A10	B12	W521	CCOC1=C(/C=N/N2CCOCC2)C=CC=C1	O=C(O1)ON=C1C2=CC=C(N(C)C)C=C2	O=C(NC1=CC=CC(OCC)=C1/C=N/N2CCOCC2)C3=CC=C(N(C)C)C=C3	2
A18	B12	W522	CN(C)C1=CC=C(/C=N/N2CCOCC2)C=C1	O=C(O1)ON=C1C2=CC=C(N(C)C)C=C2	O=C(NC1=CC(N(C)C)=CC=C1/C=N/N2CCOCC2)C3=CC=C(N(C)C)C=C3	1
A7	B13	W523	CC(C1=CC=C(/C=N/N2CCOCC2)C=C1)(C)C	O=C(O1)ON=C1C2=CC=C(C=C)C=C2	O=C(NC1=CC(C(C)(C)C)=CC=C1/C=N/N2CCOCC2)C3=CC=C(C=C)C=C3	7
A10	B13	W524	CCOC1=C(/C=N/N2CCOCC2)C=CC=C1	O=C(O1)ON=C1C2=CC=C(C=C)C=C2	O=C(NC1=CC=CC(OCC)=C1/C=N/N2CCOCC2)C3=CC=C(C=C)C=C3	2
A18	B13	W525	CN(C)C1=CC=C(/C=N/N2CCOCC2)C=C1	O=C(O1)ON=C1C2=CC=C(C=C)C=C2	O=C(NC1=CC(N(C)C)=CC=C1/C=N/N2CCOCC2)C3=CC=C(C=C)C=C3	9
A7	B14	W526	CC(C1=CC=C(/C=N/N2CCOCC2)C=C1)(C)C	O=C(O1)ON=C1C2=CC(C)=CC(C)=C2	O=C(NC1=CC(C(C)(C)C)=CC=C1/C=N/N2CCOCC2)C3=CC(C)=CC(C)=C3	32
A10	B14	W527	CCOC1=C(/C=N/N2CCOCC2)C=CC=C1	O=C(O1)ON=C1C2=CC(C)=CC(C)=C2	O=C(NC1=CC=CC(OCC)=C1/C=N/N2CCOCC2)C3=CC(C)=CC(C)=C3	7
A18	B14	W528	CN(C)C1=CC=C(/C=N/N2CCOCC2)C=C1	O=C(O1)ON=C1C2=CC(C)=CC(C)=C2	CN(C)C1=CC=C(/C=N/N2CCOCC2)C(NC(C3=CC(C)=CC(C)=C3)=O)=C1	32
A7	B15	W529	CC(C1=CC=C(/C=N/N2CCOCC2)C=C1)(C)C	O=C(O1)ON=C1C2=CC(F)=CC(F)=C2	O=C(NC1=CC(C(C)(C)C)=CC=C1/C=N/N2CCOCC2)C3=CC(F)=CC(F)=C3	73
A10	B15	W530	CCOC1=C(/C=N/N2CCOCC2)C=CC=C1	O=C(O1)ON=C1C2=CC(F)=CC(F)=C2	O=C(NC1=CC=CC(OCC)=C1/C=N/N2CCOCC2)C3=CC(F)=CC(F)=C3	9
A18	B15	W531	CN(C)C1=CC=C(/C=N/N2CCOCC2)C=C1	O=C(O1)ON=C1C2=CC(F)=CC(F)=C2	CN(C)C1=CC=C(/C=N/N2CCOCC2)C(NC(C3=CC(F)=CC(F)=C3)=O)=C1	64
A7	B16	W532	CC(C1=CC=C(/C=N/N2CCOCC2)C=C1)(C)C	O=C(O1)ON=C1C2=CC(OCCO3)=C3C=C2	O=C(NC1=CC(C(C)(C)C)=CC=C1/C=N/N2CCOCC2)C3=CC=C(OCCO4)C4=C3	44
A10	B16	W533	CCOC1=C(/C=N/N2CCOCC2)C=CC=C1	O=C(O1)ON=C1C2=CC(OCCO3)=C3C=C2	O=C(NC1=CC=CC(OCC)=C1/C=N/N2CCOCC2)C3=CC=C(OCCO4)C4=C3	16
A18	B16	W534	CN(C)C1=CC=C(/C=N/N2CCOCC2)C=C1	O=C(O1)ON=C1C2=CC(OCCO3)=C3C=C2	O=C(NC1=CC(N(C)C)=CC=C1/C=N/N2CCOCC2)C3=CC=C(OCCO4)C4=C3	37
A1	B17	W535	C1(/C=N/N2CCOCC2)=CC=CC=C1	O=C(O1)ON=C1C2=CC(C=CC=C3)=C3C=C2	O=C(NC1=CC=CC=C1/C=N/N2CCOCC2)C3=CC=C(C=CC=C4)C4=C3	46
A2	B17	W536	CC1=CC=C(/C=N/N2CCOCC2)C=C1	O=C(O1)ON=C1C2=CC(C=CC=C3)=C3C=C2	O=C(NC1=CC(C)=CC=C1/C=N/N2CCOCC2)C3=CC=C(C=CC=C4)C4=C3	55
A3	B17	W537	CC1=CC=CC(/C=N/N2CCOCC2)=C1	O=C(O1)ON=C1C2=CC(C=CC=C3)=C3C=C2	O=C(NC1=CC=C(C)C=C1/C=N/N2CCOCC2)C3=CC=C(C=CC=C4)C4=C3	51
A4	B17	W538	CC1=C(/C=N/N2CCOCC2)C=CC=C1	O=C(O1)ON=C1C2=CC(C=CC=C3)=C3C=C2	O=C(NC1=C(/C=N/N2CCOCC2)C(C)=CC=C1)C3=CC=C(C=CC=C4)C4=C3	53
A5	B17	W539	CCC1=CC=C(/C=N/N2CCOCC2)C=C1	O=C(O1)ON=C1C2=CC(C=CC=C3)=C3C=C2	O=C(NC1=CC(CC)=CC=C1/C=N/N2CCOCC2)C3=CC=C(C=CC=C4)C4=C3	42
A6	B17	W540	CC(C)C1=CC=C(/C=N/N2CCOCC2)C=C1	O=C(O1)ON=C1C2=CC(C=CC=C3)=C3C=C2	O=C(NC1=CC(C(C)C)=CC=C1/C=N/N2CCOCC2)C3=CC=C(C=CC=C4)C4=C3	54
A7	B17	W541	CC(C1=CC=C(/C=N/N2CCOCC2)C=C1)(C)C	O=C(O1)ON=C1C2=CC(C=CC=C3)=C3C=C2	O=C(NC1=CC(C(C)(C)C)=CC=C1/C=N/N2CCOCC2)C3=CC=C(C=CC=C4)C4=C3	55
A8	B17	W542	COC1=CC=C(/C=N/N2CCOCC2)C=C1	O=C(O1)ON=C1C2=CC(C=CC=C3)=C3C=C2	O=C(NC1=CC(OC)=CC=C1/C=N/N2CCOCC2)C3=CC=C(C=CC=C4)C4=C3	43
A9	B17	W543	COC1=C(/C=N/N2CCOCC2)C=CC=C1	O=C(O1)ON=C1C2=CC(C=CC=C3)=C3C=C2	O=C(NC1=C(/C=N/N2CCOCC2)C(OC)=CC=C1)C3=CC=C(C=CC=C4)C4=C3	11
A10	B17	W544	CCOC1=C(/C=N/N2CCOCC2)C=CC=C1	O=C(O1)ON=C1C2=CC(C=CC=C3)=C3C=C2	O=C(NC1=CC=CC(OCC)=C1/C=N/N2CCOCC2)C3=CC=C(C=CC=C4)C4=C3	16
A11	B17	W545	FC1=CC=C(/C=N/N2CCOCC2)C=C1	O=C(O1)ON=C1C2=CC(C=CC=C3)=C3C=C2	O=C(NC1=C(/C=N/N2CCOCC2)C=CC(F)=C1)C3=CC=C(C=CC=C4)C4=C3	40
A12	B17	W546	FC1=CC(/C=N/N2CCOCC2)=CC=C1	O=C(O1)ON=C1C2=CC(C=CC=C3)=C3C=C2	O=C(NC1=C(/C=N/N2CCOCC2)C=C(F)C=C1)C3=CC=C(C=CC=C4)C4=C3	36
A13	B17	W547	FC1=C(/C=N/N2CCOCC2)C=CC=C1	O=C(O1)ON=C1C2=CC(C=CC=C3)=C3C=C2	O=C(NC1=CC=CC(F)=C1/C=N/N2CCOCC2)C3=CC=C(C=CC=C4)C4=C3	61
A14	B17	W548	ClC1=CC=C(/C=N/N2CCOCC2)C=C1	O=C(O1)ON=C1C2=CC(C=CC=C3)=C3C=C2	O=C(NC1=CC(Cl)=CC=C1/C=N/N2CCOCC2)C3=CC=C(C=CC=C4)C4=C3	50
A15	B17	W549	BrC1=CC=C(/C=N/N2CCOCC2)C=C1	O=C(O1)ON=C1C2=CC(C=CC=C3)=C3C=C2	O=C(NC1=CC(Br)=CC=C1/C=N/N2CCOCC2)C3=CC=C(C=CC=C4)C4=C3	41
A16	B17	W550	BrC1=C(/C=N/N2CCOCC2)C=CC=C1	O=C(O1)ON=C1C2=CC(C=CC=C3)=C3C=C2	O=C(NC1=CC(Br)=CC=C1/C=N/N2CCOCC2)C3=CC=C(C=CC=C4)C4=C3	46
A17	B17	W551	FC(C1=CC=CC(/C=N/N2CCOCC2)=C1)(F)F	O=C(O1)ON=C1C2=CC(C=CC=C3)=C3C=C2	O=C(NC1=CC=C(C(F)(F)F)C=C1/C=N/N2CCOCC2)C3=CC=C(C=CC=C4)C4=C3	42
A18	B17	W552	CN(C)C1=CC=C(/C=N/N2CCOCC2)C=C1	O=C(O1)ON=C1C2=CC(C=CC=C3)=C3C=C2	O=C(NC1=CC(N(C)C)=CC=C1/C=N/N2CCOCC2)C3=CC=C(C=CC=C4)C4=C3	40
A19	B17	W553	OC(C=C1)=CC=C1/C=N/N2CCOCC2	O=C(O1)ON=C1C2=CC(C=CC=C3)=C3C=C2	O=C(NC1=CC(O)=CC=C1/C=N/N2CCOCC2)C3=CC=C(C=CC=C4)C4=C3	14
A20	B17	W554	OC(C=CC=C1)=C1/C=N/N2CCOCC2	O=C(O1)ON=C1C2=CC(C=CC=C3)=C3C=C2	O=C(NC1=CC=CC(O)=C1/C=N/N2CCOCC2)C3=CC=C(C=CC=C4)C4=C3	8
A21	B17	W555	O=C(C1=CC=C(/C=N/N2CCOCC2)C=C1)OC	O=C(O1)ON=C1C2=CC(C=CC=C3)=C3C=C2	O=C(NC1=CC(C(OC)=O)=CC=C1/C=N/N2CCOCC2)C3=CC=C(C=CC=C4)C4=C3	39
A22	B17	W556	N#CC1=CC=C(/C=N/N2CCOCC2)C=C1	O=C(O1)ON=C1C2=CC(C=CC=C3)=C3C=C2	O=C(NC1=CC(C#N)=CC=C1/C=N/N2CCOCC2)C3=CC=C(C=CC=C4)C4=C3	5
A23	B17	W557	O=S(C1=CC=C(/C=N/N2CCOCC2)C=C1)(C)=O	O=C(O1)ON=C1C2=CC(C=CC=C3)=C3C=C2	O=C(NC1=CC(S(=O)(C)=O)=CC=C1/C=N/N2CCOCC2)C3=CC=C(C=CC=C4)C4=C3	56
A24	B17	W558	O=[N+](C1=CC(/C=N/N2CCOCC2)=CC=C1)[O-]	O=C(O1)ON=C1C2=CC(C=CC=C3)=C3C=C2	O=C(NC1=C(/C=N/N2CCOCC2)C=C(C=C1)[N+]([O-])=O)C3=CC=C(C=CC=C4)C4=C3	17
A25	B17	W559	O=[N+](C1=CC=CC=C1/C=N/N2CCOCC2)[O-]	O=C(O1)ON=C1C2=CC(C=CC=C3)=C3C=C2	O=C(NC1=C(/C=N/N2CCOCC2)C([N+]([O-])=O)=CC=C1)C3=CC=C(C=CC=C4)C4=C3	52
A26	B17	W560	C=CC1=CC=C(/C=N/N2CCOCC2)C=C1	O=C(O1)ON=C1C2=CC(C=CC=C3)=C3C=C2	O=C(NC1=CC(C=C)=CC=C1/C=N/N2CCOCC2)C3=CC=C(C=CC=C4)C4=C3	26
A27	B17	W561	CC1=C(/C=N/N2CCOCC2)C=CC=C1C	O=C(O1)ON=C1C2=CC(C=CC=C3)=C3C=C2	O=C(NC1=CC=C(C)C(C)=C1/C=N/N2CCOCC2)C3=CC=C(C=CC=C4)C4=C3	40
A28	B17	W562	CC1=CC(C)=CC(/C=N/N2CCOCC2)=C1	O=C(O1)ON=C1C2=CC(C=CC=C3)=C3C=C2	O=C(NC1=C(/C=N/N2CCOCC2)C=C(C)C=C1C)C3=CC=C(C=CC=C4)C4=C3	25
A29	B17	W563	C12=CC(/C=N/N3CCOCC3)=CC=C1OCC2	O=C(O1)ON=C1C2=CC(C=CC=C3)=C3C=C2	O=C(NC1=C(/C=N/N2CCOCC2)C=C(CCO3)C3=C1)C4=CC=C(C=CC=C5)C5=C4	45
A30	B17	W564	C1(C=CC=C2)=C2C=CC=C1/C=N\N3CCOCC3	O=C(O1)ON=C1C2=CC(C=CC=C3)=C3C=C2	O=C(NC1=C(/C=N\N2CCOCC2)C(C=CC=C3)=C3C=C1)C4=CC=C(C=CC=C5)C5=C4	40
A7	B18	W565	CC(C1=CC=C(/C=N/N2CCOCC2)C=C1)(C)C	O=C1ON=C(/C=C/C2=CC=C(C)C=C2)O1	O=C(NC1=CC(C(C)(C)C)=CC=C1/C=N/N2CCOCC2)/C=C/C3=CC=C(C)C=C3	8
A10	B18	W566	CCOC1=C(/C=N/N2CCOCC2)C=CC=C1	O=C1ON=C(/C=C/C2=CC=C(C)C=C2)O1	O=C(NC1=CC=CC(OCC)=C1/C=N/N2CCOCC2)/C=C/C3=CC=C(C)C=C3	2
A18	B18	W567	CN(C)C1=CC=C(/C=N/N2CCOCC2)C=C1	O=C1ON=C(/C=C/C2=CC=C(C)C=C2)O1	O=C(NC1=CC(N(C)C)=CC=C1/C=N/N2CCOCC2)/C=C/C3=CC=C(C)C=C3	0
A1	B19	W568	C1(/C=N/N2CCOCC2)=CC=CC=C1	O=C1ON=C(/C=C/C2=CC=C(Cl)C=C2)O1	ClC(C=C1)=CC=C1/C=C/C(NC(C=CC=C2)=C2/C=N/N3CCOCC3)=O	40
A2	B19	W569	CC1=CC=C(/C=N/N2CCOCC2)C=C1	O=C1ON=C(/C=C/C2=CC=C(Cl)C=C2)O1	CC1=CC(NC(/C=C/C2=CC=C(C=C2)Cl)=O)=C(C=C1)/C=N/N3CCOCC3	32
A3	B19	W570	CC1=CC=CC(/C=N/N2CCOCC2)=C1	O=C1ON=C(/C=C/C2=CC=C(Cl)C=C2)O1	CC1=CC=C(NC(/C=C/C2=CC=C(C=C2)Cl)=O)C(/C=N/N3CCOCC3)=C1	33
A4	B19	W571	CC1=C(/C=N/N2CCOCC2)C=CC=C1	O=C1ON=C(/C=C/C2=CC=C(Cl)C=C2)O1	CC1=C(C(NC(/C=C/C2=CC=C(C=C2)Cl)=O)=CC=C1)/C=N/N3CCOCC3	45
A5	B19	W572	CCC1=CC=C(/C=N/N2CCOCC2)C=C1	O=C1ON=C(/C=C/C2=CC=C(Cl)C=C2)O1	CCC1=CC(NC(/C=C/C2=CC=C(C=C2)Cl)=O)=C(C=C1)/C=N/N3CCOCC3	43
A6	B19	W573	CC(C)C1=CC=C(/C=N/N2CCOCC2)C=C1	O=C1ON=C(/C=C/C2=CC=C(Cl)C=C2)O1	CC(C1=CC(NC(/C=C/C2=CC=C(C=C2)Cl)=O)=C(C=C1)/C=N/N3CCOCC3)C	35
A7	B19	W574	CC(C1=CC=C(/C=N/N2CCOCC2)C=C1)(C)C	O=C1ON=C(/C=C/C2=CC=C(Cl)C=C2)O1	CC(C)(C)C1=CC(NC(/C=C/C2=CC=C(C=C2)Cl)=O)=C(C=C1)/C=N/N3CCOCC3	36
A8	B19	W575	COC1=CC=C(/C=N/N2CCOCC2)C=C1	O=C1ON=C(/C=C/C2=CC=C(Cl)C=C2)O1	COC1=CC(NC(/C=C/C2=CC=C(C=C2)Cl)=O)=C(C=C1)/C=N/N3CCOCC3	45
A9	B19	W576	COC1=C(/C=N/N2CCOCC2)C=CC=C1	O=C1ON=C(/C=C/C2=CC=C(Cl)C=C2)O1	COC1=C(C(NC(/C=C/C2=CC=C(C=C2)Cl)=O)=CC=C1)/C=N/N3CCOCC3	8
A10	B19	W577	CCOC1=C(/C=N/N2CCOCC2)C=CC=C1	O=C1ON=C(/C=C/C2=CC=C(Cl)C=C2)O1	CCOC1=C(C(NC(/C=C/C2=CC=C(C=C2)Cl)=O)=CC=C1)/C=N/N3CCOCC3	9
A11	B19	W578	FC1=CC=C(/C=N/N2CCOCC2)C=C1	O=C1ON=C(/C=C/C2=CC=C(Cl)C=C2)O1	FC1=CC(NC(/C=C/C2=CC=C(C=C2)Cl)=O)=C(C=C1)/C=N/N3CCOCC3	36
A12	B19	W579	FC1=CC(/C=N/N2CCOCC2)=CC=C1	O=C1ON=C(/C=C/C2=CC=C(Cl)C=C2)O1	FC1=CC(/C=N/N2CCOCC2)=C(NC(/C=C/C3=CC=C(C=C3)Cl)=O)C=C1	26
A13	B19	W580	FC1=C(/C=N/N2CCOCC2)C=CC=C1	O=C1ON=C(/C=C/C2=CC=C(Cl)C=C2)O1	FC1=C(C(NC(/C=C/C2=CC=C(C=C2)Cl)=O)=CC=C1)/C=N/N3CCOCC3	49
A14	B19	W581	ClC1=CC=C(/C=N/N2CCOCC2)C=C1	O=C1ON=C(/C=C/C2=CC=C(Cl)C=C2)O1	ClC1=CC(NC(/C=C/C2=CC=C(C=C2)Cl)=O)=C(C=C1)/C=N/N3CCOCC3	47
A15	B19	W582	BrC1=CC=C(/C=N/N2CCOCC2)C=C1	O=C1ON=C(/C=C/C2=CC=C(Cl)C=C2)O1	BrC1=CC(NC(/C=C/C2=CC=C(C=C2)Cl)=O)=C(C=C1)/C=N/N3CCOCC3	38
A16	B19	W583	BrC1=C(/C=N/N2CCOCC2)C=CC=C1	O=C1ON=C(/C=C/C2=CC=C(Cl)C=C2)O1	BrC1=C(C(NC(/C=C/C2=CC=C(C=C2)Cl)=O)=CC=C1)/C=N/N3CCOCC3	36
A17	B19	W584	FC(C1=CC=CC(/C=N/N2CCOCC2)=C1)(F)F	O=C1ON=C(/C=C/C2=CC=C(Cl)C=C2)O1	FC(F)(F)C1=CC=C(NC(/C=C/C2=CC=C(C=C2)Cl)=O)C(/C=N/N3CCOCC3)=C1	33
A18	B19	W585	CN(C)C1=CC=C(/C=N/N2CCOCC2)C=C1	O=C1ON=C(/C=C/C2=CC=C(Cl)C=C2)O1	CN(C1=CC(NC(/C=C/C2=CC=C(C=C2)Cl)=O)=C(C=C1)/C=N/N3CCOCC3)C	41
A19	B19	W586	OC(C=C1)=CC=C1/C=N/N2CCOCC2	O=C1ON=C(/C=C/C2=CC=C(Cl)C=C2)O1	OC1=CC=C(/C=N/N2CCOCC2)C(NC(/C=C/C3=CC=C(C=C3)Cl)=O)=C1	23
A20	B19	W587	OC(C=CC=C1)=C1/C=N/N2CCOCC2	O=C1ON=C(/C=C/C2=CC=C(Cl)C=C2)O1	OC1=C(/C=N/N2CCOCC2)C(NC(/C=C/C3=CC=C(C=C3)Cl)=O)=CC=C1	1
A21	B19	W588	O=C(C1=CC=C(/C=N/N2CCOCC2)C=C1)OC	O=C1ON=C(/C=C/C2=CC=C(Cl)C=C2)O1	O=C(OC)C1=CC(NC(/C=C/C2=CC=C(C=C2)Cl)=O)=C(C=C1)/C=N/N3CCOCC3	30
A22	B19	W589	N#CC1=CC=C(/C=N/N2CCOCC2)C=C1	O=C1ON=C(/C=C/C2=CC=C(Cl)C=C2)O1	N#CC1=CC(NC(/C=C/C2=CC=C(C=C2)Cl)=O)=C(C=C1)/C=N/N3CCOCC3	9
A23	B19	W590	O=S(C1=CC=C(/C=N/N2CCOCC2)C=C1)(C)=O	O=C1ON=C(/C=C/C2=CC=C(Cl)C=C2)O1	O=S(C1=CC(NC(/C=C/C2=CC=C(C=C2)Cl)=O)=C(C=C1)/C=N/N3CCOCC3)(C)=O	21
A24	B19	W591	O=[N+](C1=CC(/C=N/N2CCOCC2)=CC=C1)[O-]	O=C1ON=C(/C=C/C2=CC=C(Cl)C=C2)O1	O=[N+]([O-])C1=CC(/C=N/N2CCOCC2)=C(NC(/C=C/C3=CC=C(C=C3)Cl)=O)C=C1	13
A25	B19	W592	O=[N+](C1=CC=CC=C1/C=N/N2CCOCC2)[O-]	O=C1ON=C(/C=C/C2=CC=C(Cl)C=C2)O1	O=[N+]([O-])C1=CC=CC(NC(/C=C/C2=CC=C(C=C2)Cl)=O)=C1/C=N/N3CCOCC3	36
A26	B19	W593	C=CC1=CC=C(/C=N/N2CCOCC2)C=C1	O=C1ON=C(/C=C/C2=CC=C(Cl)C=C2)O1	C=CC1=CC(NC(/C=C/C2=CC=C(C=C2)Cl)=O)=C(C=C1)/C=N/N3CCOCC3	16
A27	B19	W594	CC1=C(/C=N/N2CCOCC2)C=CC=C1C	O=C1ON=C(/C=C/C2=CC=C(Cl)C=C2)O1	CC1=C(C(NC(/C=C/C2=CC=C(C=C2)Cl)=O)=CC=C1C)/C=N/N3CCOCC3	38
A28	B19	W595	CC1=CC(C)=CC(/C=N/N2CCOCC2)=C1	O=C1ON=C(/C=C/C2=CC=C(Cl)C=C2)O1	CC1=CC(C)=C(NC(/C=C/C2=CC=C(C=C2)Cl)=O)C(/C=N/N3CCOCC3)=C1	14
A29	B19	W596	C12=CC(/C=N/N3CCOCC3)=CC=C1OCC2	O=C1ON=C(/C=C/C2=CC=C(Cl)C=C2)O1	ClC(C=C1)=CC=C1/C=C/C(NC2=C(/C=N/N3CCOCC3)C=C4C(OCC4)=C2)=O	30
A30	B19	W597	C1(C=CC=C2)=C2C=CC=C1/C=N\N3CCOCC3	O=C1ON=C(/C=C/C2=CC=C(Cl)C=C2)O1	ClC(C=C1)=CC=C1/C=C/C(NC2=C(/C=N\N3CCOCC3)C4=C(C=C2)C=CC=C4)=O	9
A7	B20	W598	CC(C1=CC=C(/C=N/N2CCOCC2)C=C1)(C)C	O=C1ON=C(CCC2=CC=C(C)C=C2)O1	CC(C)(C)C1=CC(NC(CCC2=CC=C(C=C2)C)=O)=C(C=C1)/C=N/N3CCOCC3	9
A10	B20	W599	CCOC1=C(/C=N/N2CCOCC2)C=CC=C1	O=C1ON=C(CCC2=CC=C(C)C=C2)O1	CCOC1=C(C(NC(CCC2=CC=C(C=C2)C)=O)=CC=C1)/C=N/N3CCOCC3	0
A18	B20	W600	CN(C)C1=CC=C(/C=N/N2CCOCC2)C=C1	O=C1ON=C(CCC2=CC=C(C)C=C2)O1	CN(C1=CC(NC(CCC2=CC=C(C=C2)C)=O)=C(C=C1)/C=N/N3CCOCC3)C	2
